# Supplementary material for: Paternity Analyses for the Planning of SIT Projects against the Red Palm Weevil
Source: MDPI journal article supplement (doi:10.3390/insects14040326), 2023-03-28
Supplement: s1 [file s1]

## Supplementary Material

Table S1. The reproductive parameters of experiment #1

| Oviposition event | Oviposition date | # laid eggs | # hatched eggs | % hatching | # survived larvae |
|-------------------|------------------|-------------|----------------|------------|-------------------|
| I                 | 27.IX.13         | 10          | 7              | 70         | 3                 |
| II                | 30.IX.13         | 6           | 5              | 83         | 4                 |
| III               | 03.X.13          | 19          | 7              | 37         | 6                 |
| IV                | 04.X.13          | 8           | 7              | 88         | 4                 |
| V                 | 07.X.13          | 29          | 28             | 97         | 21                |
| VI                | 08.X.13          | 16          | 16             | 100        | 6                 |
| VII               | 10.X.13          | 6           | 4              | 67         | 3                 |
| VIII              | 11.X.13          | 8           | 4              | 50         | 4                 |
| IX                | 14.X.13          | 7           | 7              | 100        | 2                 |
| X                 | 16.X.13          | 6           | 6              | 100        | 2                 |
| XI                | 18.X.13          | 12          | 11             | 92         | 9                 |
| XII               | 21.X.13          | 13          | 11             | 85         | 9                 |
| XIII              | 23.X.13          | 8           | 7              | 88         | 2                 |
| XIV               | 25.X.13          | 10          | 7              | 70         | 6                 |

**Table S2. The reproductive parameters of experiment #2**

| <b>Oviposition event</b> | <b>Oviposition date</b> | <b># laid eggs</b> | <b># hatched eggs</b> | <b>% hatching</b> | <b># survived larvae</b> |
|--------------------------|-------------------------|--------------------|-----------------------|-------------------|--------------------------|
| I                        | 17.I.14                 | 13                 | 8                     | 61                | 8                        |
| II                       | 20.I.14                 | 40                 | 31                    | 77                | 30                       |
| III                      | 21.I.14                 | 9                  | 9                     | 100               | 9                        |
| IV                       | 22.I.14                 | 8                  | 6                     | 75                | 6                        |
| V                        | 23.I.14                 | 8                  | 4                     | 50                | 4                        |
| VI                       | 24.I.14                 | 1                  | 1                     | 100               | 1                        |
| VII                      | 27.I.14                 | 22                 | 15                    | 68                | 13                       |
| VIII                     | 28.I.14                 | 11                 | 8                     | 73                | 7                        |
| IX                       | 30.I.14                 | 14                 | 3                     | 21                | 3                        |
| X                        | 31.I.14                 | 4                  | 3                     | 75                | 2                        |
| XI                       | 03.II.14                | 24                 | 20                    | 83                | 19                       |
| XII                      | 04.II.14                | 7                  | 5                     | 71                | 4                        |
| XIII                     | 05.II.14                | 6                  | 2                     | 33                | 2                        |
| XIV                      | 10.II.14                | 13                 | 10                    | 77                | 10                       |
| XV                       | 11.II.14                | 7                  | 5                     | 71                | 5                        |
| XVI                      | 12.II.14                | 2                  | 1                     | 50                | 1                        |
| XVII                     | 13.II.14                | 1                  | 1                     | 100               | 1                        |

**Table S3. The progeny genotypes from the three most informative loci of experiment #1 (ordered by oviposition event)**

| Event | Sample ID | RPW06 |     | RPW32 |     | RPW11 |     |
|-------|-----------|-------|-----|-------|-----|-------|-----|
| I     | IV3.L01   | 90    | 96  | 218   | 218 | 158   | 164 |
| I     | IV3.L02   | 90    | 94  | 218   | 218 | 161   | 164 |
| I     | IV3.L03   | 96    | 100 | 218   | 218 | 158   | 158 |
| II    | IV3.L04   | 94    | 100 | 218   | 236 | 158   | 158 |
| II    | IV3.L05   | 94    | 100 | 218   | 218 | 161   | 164 |
| II    | IV3.L06   | 90    | 94  | 218   | 218 | 158   | 158 |
| II    | IV3.L07   | 94    | 100 | 218   | 218 | 158   | 161 |
| III   | IV3.L08   | 90    | 96  | 218   | 236 | 158   | 161 |
| III   | IV3.L09   | 94    | 100 | 218   | 236 | 158   | 161 |
| III   | IV3.L10   | 94    | 100 | 218   | 236 | 158   | 161 |
| III   | IV3.L11   | 90    | 96  | 218   | 218 | 158   | 158 |
| III   | IV3.L12   | 90    | 96  | 218   | 218 | 158   | 161 |
| III   | IV3.L13   | 94    | 100 | 218   | 218 | 158   | 161 |
| IV    | IV3.L14   | 90    | 94  | 218   | 236 | 158   | 161 |
| IV    | IV3.L15   | 96    | 100 | 218   | 236 | 158   | 158 |
| IV    | IV3.L16   | 96    | 100 | 218   | 218 | 158   | 164 |
| IV    | IV3.L17   | 94    | 100 | 218   | 218 | 158   | 164 |
| V     | IV3.L18   | 90    | 94  | 218   | 236 | 158   | 158 |
| V     | IV3.L19   | 90    | 96  | 218   | 218 | 161   | 164 |
| V     | IV3.L20   | 90    | 96  | 218   | 236 | 158   | 158 |
| V     | IV3.L21   | 90    | 94  | 218   | 236 | 158   | 158 |
| V     | IV3.L22   | 94    | 100 | 218   | 218 | 158   | 158 |
| V     | IV3.L23   | 96    | 100 | 218   | 236 | 158   | 158 |
| V     | IV3.L24   | 90    | 96  | 218   | 236 | 158   | 161 |
| V     | IV3.L25   | 90    | 96  | 218   | 236 | 161   | 164 |

|             |         |    |     |     |     |     |     |
|-------------|---------|----|-----|-----|-----|-----|-----|
| <b>V</b>    | IV3.L26 | 90 | 94  | 218 | 236 | 158 | 164 |
| <b>V</b>    | IV3.L27 | 90 | 96  | 218 | 218 | 161 | 164 |
| <b>V</b>    | IV3.L28 | 96 | 100 | 218 | 218 | 158 | 164 |
| <b>V</b>    | IV3.L29 | 96 | 100 | 218 | 236 | 158 | 164 |
| <b>V</b>    | IV3.L30 | 94 | 100 | 218 | 236 | 158 | 158 |
| <b>V</b>    | IV3.L31 | 94 | 100 | 218 | 218 | 158 | 161 |
| <b>V</b>    | IV3.L32 | 94 | 100 | 218 | 236 | 158 | 158 |
| <b>V</b>    | IV3.L33 | 94 | 100 | 218 | 236 | 158 | 161 |
| <b>V</b>    | IV3.L34 | 90 | 96  | 218 | 218 | 158 | 161 |
| <b>V</b>    | IV3.L35 | 90 | 94  | 218 | 218 | 158 | 158 |
| <b>V</b>    | IV3.L36 | 96 | 100 | 218 | 218 | 158 | 164 |
| <b>V</b>    | IV3.L37 | 96 | 100 | 218 | 236 | 161 | 164 |
| <b>V</b>    | IV3.L38 | 90 | 96  | 218 | 218 | 158 | 161 |
| <b>VI</b>   | IV3.L39 | 90 | 94  | 218 | 236 | 158 | 164 |
| <b>VI</b>   | IV3.L40 | 90 | 94  | 218 | 218 | 158 | 164 |
| <b>VI</b>   | IV3.L41 | 94 | 100 | 218 | 218 | 161 | 164 |
| <b>VI</b>   | IV3.L42 | 96 | 100 | 218 | 218 | 158 | 161 |
| <b>VI</b>   | IV3.L43 | 94 | 100 | 218 | 236 | 158 | 164 |
| <b>VI</b>   | IV3.L44 | 96 | 100 | 218 | 218 | 158 | 158 |
| <b>VII</b>  | IV3.L46 | 96 | 100 | 218 | 218 | 158 | 158 |
| <b>VII</b>  | IV3.L47 | 96 | 100 | 218 | 236 | 158 | 158 |
| <b>VIII</b> | IV3.L48 | 90 | 94  | 218 | 218 | 158 | 161 |
| <b>VIII</b> | IV3.L49 | 90 | 96  | 218 | 218 | 161 | 164 |
| <b>VIII</b> | IV3.L50 | 94 | 100 | 218 | 218 | 158 | 161 |
| <b>VIII</b> | IV3.L51 | 90 | 96  | 218 | 218 | 158 | 161 |
| <b>IX</b>   | IV3.L52 | 90 | 94  | 218 | 236 | 158 | 161 |
| <b>IX</b>   | IV3.L53 | 96 | 100 | 218 | 218 | 158 | 158 |
| <b>X</b>    | IV3.L54 | 90 | 94  | 218 | 236 | 158 | 164 |

|             |         |    |     |     |     |     |     |
|-------------|---------|----|-----|-----|-----|-----|-----|
| <b>X</b>    | IV3.L55 | 90 | 94  | 218 | 236 | 158 | 164 |
| <b>XI</b>   | IV3.L56 | 90 | 94  | 218 | 218 | 158 | 161 |
| <b>XI</b>   | IV3.L57 | 96 | 100 | 218 | 236 | 158 | 158 |
| <b>XI</b>   | IV3.L58 | 96 | 100 | 218 | 236 | 161 | 164 |
| <b>XI</b>   | IV3.L59 | 90 | 94  | 218 | 218 | 161 | 164 |
| <b>XI</b>   | IV3.L60 | 94 | 100 | 218 | 218 | 158 | 158 |
| <b>XI</b>   | IV3.L61 | 90 | 94  | 218 | 218 | 158 | 164 |
| <b>XI</b>   | IV3.L62 | 90 | 96  | 218 | 218 | 161 | 164 |
| <b>XI</b>   | IV3.L63 | 96 | 100 | 218 | 236 | 158 | 164 |
| <b>XI</b>   | IV3.L64 | 94 | 100 | 218 | 236 | 158 | 161 |
| <b>XII</b>  | IV3.L65 | 90 | 96  | 218 | 218 | 158 | 161 |
| <b>XII</b>  | IV3.L66 | 90 | 96  | 218 | 218 | 158 | 161 |
| <b>XII</b>  | IV3.L67 | 90 | 96  | 218 | 218 | 158 | 161 |
| <b>XII</b>  | IV3.L68 | 90 | 94  | 218 | 218 | 158 | 158 |
| <b>XII</b>  | IV3.L69 | 90 | 96  | 218 | 236 | 158 | 158 |
| <b>XII</b>  | IV3.L70 | 94 | 100 | 218 | 218 | 158 | 164 |
| <b>XII</b>  | IV3.L71 | 90 | 94  | 218 | 236 | 158 | 158 |
| <b>XII</b>  | IV3.L72 | 90 | 94  | 218 | 218 | 158 | 158 |
| <b>XII</b>  | IV3.L73 | 90 | 96  | 218 | 236 | 158 | 161 |
| <b>XIII</b> | IV3.L74 | 90 | 96  | 218 | 236 | 161 | 164 |
| <b>XIII</b> | IV3.L75 | 94 | 100 | 218 | 218 | 158 | 164 |
| <b>XIV</b>  | IV3.L76 | 90 | 94  | 218 | 218 | 158 | 161 |
| <b>XIV</b>  | IV3.L77 | 90 | 94  | 218 | 218 | 158 | 161 |
| <b>XIV</b>  | IV3.L78 | 94 | 100 | 218 | 218 | 161 | 164 |
| <b>XIV</b>  | IV3.L79 | 96 | 100 | 218 | 236 | 158 | 161 |
| <b>XIV</b>  | IV3.L80 | 90 | 96  | 218 | 236 | 158 | 161 |
| <b>XIV</b>  | IV3.L81 | 94 | 100 | 218 | 218 | 158 | 164 |

**Table S4. The progeny genotypes from the five most informative loci of experiment 2 (ordered by oviposition event)**

| Event | Sample ID | RPW02 |     | RPW39 |     | RPW06 |    | RPW32 |     | RPW38 |     |
|-------|-----------|-------|-----|-------|-----|-------|----|-------|-----|-------|-----|
| I     | IV4.L01   | 300   | 300 | 193   | 205 | 78    | 98 | 218   | 238 | 157   | 163 |
| I     | IV4.L02   | 300   | 300 | 203   | 205 | 78    | 98 | 238   | 238 | 157   | 163 |
| I     | IV4.L03   | 300   | 300 | 203   | 205 | 78    | 98 | 218   | 238 | 163   | 163 |
| I     | IV4.L04   | 300   | 300 | 193   | 205 | 78    | 98 | 238   | 238 | 157   | 163 |
| I     | IV4.L05   | 300   | 300 | 203   | 205 | 78    | 78 | 238   | 238 | 157   | 163 |
| I     | IV4.L06   | 300   | 300 | 203   | 205 | 78    | 78 | 218   | 238 | 163   | 163 |
| I     | IV4.L07   | 300   | 300 | 203   | 205 | 78    | 98 | 218   | 238 | 157   | 163 |
| I     | IV4.L08   | 300   | 300 | 193   | 205 | 78    | 98 | 218   | 238 | 163   | 163 |
| II    | IV4.L09   | 300   | 300 | 193   | 205 | 98    | 98 | 238   | 238 | 163   | 163 |
| II    | IV4.L10   | 300   | 300 | 203   | 205 | 78    | 98 | 238   | 238 | 157   | 163 |
| II    | IV4.L11   | 300   | 300 | 193   | 205 | 98    | 98 | 238   | 238 | 163   | 163 |
| II    | IV4.L12   | 300   | 300 | 203   | 205 | 78    | 78 | 238   | 238 | 157   | 163 |
| II    | IV4.L13   | 300   | 300 | 203   | 205 | 98    | 98 | 218   | 218 | 157   | 163 |
| II    | IV4.L14   | 300   | 300 | 193   | 205 | 78    | 98 | 218   | 238 | 157   | 163 |
| II    | IV4.L15   | 300   | 300 | 203   | 205 | 98    | 98 | 238   | 238 | 157   | 163 |
| II    | IV4.L16   | 300   | 300 | 203   | 205 | 78    | 98 | 218   | 238 | 157   | 163 |
| II    | IV4.L17   | 300   | 300 | 193   | 205 | 78    | 98 | 218   | 218 | 157   | 163 |
| II    | IV4.L18   | 300   | 300 | 203   | 205 | 78    | 98 | 218   | 238 | 157   | 163 |
| II    | IV4.L19   | 300   | 300 | 203   | 205 | 78    | 98 | 218   | 238 | 163   | 163 |
| II    | IV4.L20   | 300   | 300 | 203   | 205 | 78    | 98 | 218   | 238 | 163   | 163 |
| II    | IV4.L21   | 300   | 300 | 203   | 205 | 78    | 98 | 218   | 238 | 163   | 163 |
| II    | IV4.L22   | 300   | 300 | 193   | 205 | 78    | 98 | 218   | 238 | 157   | 163 |
| II    | IV4.L23   | 300   | 300 | 203   | 205 | 78    | 78 | 238   | 238 | 163   | 163 |
| II    | IV4.L24   | 300   | 300 | 203   | 205 | 78    | 98 | 218   | 218 | 157   | 163 |
| II    | IV4.L25   | 300   | 300 | 193   | 205 | 78    | 98 | 218   | 218 | 163   | 163 |

|     |         |     |     |     |     |    |    |     |     |     |     |
|-----|---------|-----|-----|-----|-----|----|----|-----|-----|-----|-----|
| II  | IV4.L26 | 300 | 300 | 203 | 205 | 78 | 78 | 218 | 238 | 163 | 163 |
| II  | IV4.L27 | 300 | 300 | 203 | 205 | 98 | 98 | 238 | 238 | 163 | 163 |
| II  | IV4.L28 | 300 | 300 | 193 | 205 | 78 | 78 | 218 | 218 | 157 | 163 |
| II  | IV4.L29 | 300 | 300 | 193 | 205 | 78 | 98 | 238 | 238 | 157 | 163 |
| II  | IV4.L30 | 300 | 300 | 203 | 205 | 78 | 98 | 218 | 238 | 163 | 163 |
| II  | IV4.L31 | 300 | 300 | 203 | 205 | 78 | 98 | 218 | 238 | 157 | 163 |
| II  | IV4.L32 | 300 | 300 | 203 | 205 | 78 | 78 | 218 | 238 | 157 | 163 |
| II  | IV4.L33 | 300 | 300 | 193 | 205 | 78 | 98 | 238 | 238 | 157 | 163 |
| II  | IV4.L34 | 300 | 300 | 203 | 205 | 78 | 98 | 218 | 218 | 163 | 163 |
| II  | IV4.L35 | 300 | 300 | 193 | 205 | 78 | 78 | 218 | 238 | 157 | 163 |
| II  | IV4.L36 | 300 | 300 | 203 | 205 | 98 | 98 | 238 | 238 | 163 | 163 |
| II  | IV4.L37 | 300 | 300 | 203 | 205 | 98 | 98 | 218 | 218 | 157 | 163 |
| II  | IV4.L38 | 300 | 300 | 203 | 205 | 78 | 98 | 218 | 218 | 157 | 163 |
| III | IV4.L39 | 300 | 304 | 185 | 193 | 78 | 98 | 236 | 238 | 163 | 163 |
| III | IV4.L40 | 300 | 300 | 203 | 205 | 78 | 98 | 218 | 238 | 157 | 163 |
| III | IV4.L41 | 300 | 300 | 193 | 205 | 78 | 78 | 218 | 238 | 157 | 163 |
| III | IV4.L42 | 300 | 300 | 193 | 205 | 78 | 78 | 218 | 218 | 157 | 163 |
| III | IV4.L43 | 300 | 300 | 193 | 205 | 98 | 98 | 218 | 218 | 163 | 163 |
| III | IV4.L44 | 300 | 300 | 193 | 205 | 78 | 98 | 218 | 218 | 163 | 163 |
| III | IV4.L45 | 300 | 300 | 203 | 205 | 78 | 98 | 218 | 238 | 157 | 163 |
| III | IV4.L46 | 300 | 300 | 193 | 205 | 78 | 78 | 238 | 238 | 163 | 163 |
| III | IV4.L47 | 300 | 300 | 203 | 205 | 78 | 98 | 238 | 238 | 163 | 163 |
| IV  | IV4.L48 | 300 | 300 | 203 | 205 | 78 | 98 | 218 | 238 | 157 | 163 |
| IV  | IV4.L49 | 300 | 300 | 193 | 205 | 78 | 98 | 218 | 218 | 163 | 163 |
| IV  | IV4.L50 | 300 | 300 | 203 | 205 | 78 | 98 | 218 | 238 | 157 | 163 |
| IV  | IV4.L51 | 300 | 300 | 193 | 205 | 78 | 78 | 238 | 238 | 163 | 163 |
| IV  | IV4.L52 | 300 | 300 | 193 | 205 | 98 | 98 | 218 | 218 | 163 | 163 |
| IV  | IV4.L53 | 300 | 300 | 203 | 205 | 78 | 98 | 218 | 238 | 163 | 163 |

|             |                |     |     |     |     |    |    |     |     |     |     |
|-------------|----------------|-----|-----|-----|-----|----|----|-----|-----|-----|-----|
| <b>V</b>    | <b>IV4.L54</b> | 300 | 300 | 193 | 205 | 98 | 98 | 218 | 238 | 163 | 163 |
| <b>V</b>    | <b>IV4.L55</b> | 300 | 300 | 203 | 205 | 78 | 98 | 218 | 218 | 163 | 163 |
| <b>V</b>    | <b>IV4.L56</b> | 300 | 300 | 203 | 205 | 78 | 98 | 238 | 238 | 163 | 163 |
| <b>V</b>    | <b>IV4.L57</b> | 300 | 300 | 193 | 205 | 78 | 98 | 218 | 218 | 157 | 163 |
| <b>VI</b>   | <b>IV4.L58</b> | 300 | 300 | 193 | 205 | 78 | 98 | 218 | 238 | 157 | 163 |
| <b>VII</b>  | <b>IV4.L59</b> | 300 | 300 | 193 | 205 | 78 | 78 | 238 | 238 | 163 | 163 |
| <b>VII</b>  | <b>IV4.L60</b> | 300 | 300 | 203 | 205 | 98 | 98 | 238 | 238 | 163 | 163 |
| <b>VII</b>  | <b>IV4.L61</b> | 300 | 300 | 193 | 205 | 78 | 98 | 218 | 218 | 163 | 163 |
| <b>VII</b>  | <b>IV4.L62</b> | 300 | 300 | 203 | 205 | 78 | 98 | 218 | 238 | 157 | 163 |
| <b>VII</b>  | <b>IV4.L63</b> | 300 | 300 | 203 | 205 | 78 | 98 | 238 | 238 | 163 | 163 |
| <b>VII</b>  | <b>IV4.L64</b> | 300 | 300 | 203 | 205 | 78 | 98 | 218 | 238 | 163 | 163 |
| <b>VII</b>  | <b>IV4.L65</b> | 300 | 300 | 193 | 205 | 98 | 98 | 238 | 238 | 157 | 163 |
| <b>VII</b>  | <b>IV4.L66</b> | 300 | 300 | 193 | 205 | 78 | 98 | 218 | 218 | 163 | 163 |
| <b>VII</b>  | <b>IV4.L67</b> | 300 | 300 | 203 | 205 | 98 | 98 | 218 | 218 | 157 | 163 |
| <b>VII</b>  | <b>IV4.L68</b> | 300 | 300 | 193 | 205 | 98 | 98 | 218 | 238 | 163 | 163 |
| <b>VII</b>  | <b>IV4.L69</b> | 300 | 300 | 193 | 205 | 78 | 98 | 218 | 218 | 163 | 163 |
| <b>VII</b>  | <b>IV4.L70</b> | 300 | 300 | 203 | 205 | 78 | 78 | 218 | 238 | 163 | 163 |
| <b>VII</b>  | <b>IV4.L71</b> | 300 | 300 | 193 | 205 | 78 | 98 | 218 | 218 | 157 | 163 |
| <b>VIII</b> | <b>IV4.L72</b> | 300 | 300 | 193 | 205 | 78 | 98 | 218 | 238 | 157 | 163 |
| <b>VIII</b> | <b>IV4.L73</b> | 300 | 300 | 193 | 205 | 98 | 98 | 218 | 218 | 157 | 163 |
| <b>VIII</b> | <b>IV4.L74</b> | 300 | 300 | 203 | 205 | 98 | 98 | 218 | 238 | 157 | 163 |
| <b>VIII</b> | <b>IV4.L75</b> | 300 | 300 | 193 | 205 | 78 | 78 | 218 | 218 | 163 | 163 |
| <b>VIII</b> | <b>IV4.L76</b> | 300 | 300 | 203 | 205 | 78 | 78 | 218 | 238 | 163 | 163 |
| <b>VIII</b> | <b>IV4.L77</b> | 300 | 300 | 203 | 205 | 98 | 98 | 218 | 238 | 163 | 163 |
| <b>VIII</b> | <b>IV4.L78</b> | 300 | 300 | 203 | 205 | 78 | 78 | 218 | 238 | 163 | 163 |
| <b>X</b>    | <b>IV4.L79</b> | 300 | 300 | 203 | 205 | 78 | 98 | 238 | 238 | 157 | 163 |
| <b>X</b>    | <b>IV4.L80</b> | 300 | 300 | 203 | 205 | 78 | 98 | 218 | 238 | 157 | 163 |
| <b>X</b>    | <b>IV4.L81</b> | 300 | 300 | 203 | 205 | 78 | 98 | 218 | 238 | 163 | 163 |



|             |                 |     |     |     |     |    |    |     |     |     |     |
|-------------|-----------------|-----|-----|-----|-----|----|----|-----|-----|-----|-----|
| <b>XI</b>   | <b>IV4.L82</b>  | 300 | 300 | 193 | 205 | 78 | 98 | 218 | 238 | 163 | 163 |
| <b>XI</b>   | <b>IV4.L83</b>  | 300 | 300 | 193 | 205 | 78 | 98 | 238 | 238 | 157 | 163 |
| <b>XII</b>  | <b>IV4.L84</b>  | 300 | 300 | 193 | 205 | 78 | 78 | 238 | 238 | 163 | 163 |
| <b>XII</b>  | <b>IV4.L85</b>  | 300 | 312 | 185 | 203 | 78 | 98 | 218 | 218 | 163 | 165 |
| <b>XII</b>  | <b>IV4.L86</b>  | 300 | 300 | 193 | 205 | 78 | 98 | 238 | 238 | 157 | 163 |
| <b>XII</b>  | <b>IV4.L87</b>  | 300 | 300 | 193 | 205 | 78 | 98 | 218 | 218 | 163 | 163 |
| <b>XII</b>  | <b>IV4.L88</b>  | 300 | 300 | 203 | 205 | 78 | 78 | 218 | 238 | 163 | 163 |
| <b>XII</b>  | <b>IV4.L89</b>  | 300 | 300 | 193 | 205 | 78 | 98 | 218 | 218 | 157 | 163 |
| <b>XII</b>  | <b>IV4.L90</b>  | 300 | 300 | 193 | 205 | 78 | 98 | 238 | 238 | 157 | 163 |
| <b>XII</b>  | <b>IV4.L91</b>  | 300 | 300 | 193 | 205 | 78 | 78 | 218 | 218 | 163 | 163 |
| <b>XII</b>  | <b>IV4.L92</b>  | 300 | 300 | 203 | 205 | 78 | 98 | 238 | 238 | 163 | 163 |
| <b>XII</b>  | <b>IV4.L93</b>  | 300 | 300 | 203 | 205 | 78 | 78 | 218 | 238 | 163 | 163 |
| <b>XII</b>  | <b>IV4.L94</b>  | 300 | 300 | 193 | 205 | 78 | 98 | 238 | 238 | 157 | 163 |
| <b>XII</b>  | <b>IV4.L95</b>  | 300 | 300 | 193 | 205 | 78 | 78 | 238 | 238 | 157 | 163 |
| <b>XII</b>  | <b>IV4.L96</b>  | 300 | 300 | 193 | 205 | 78 | 98 | 218 | 218 | 163 | 163 |
| <b>XII</b>  | <b>IV4.L97</b>  | 300 | 300 | 203 | 205 | 78 | 98 | 218 | 238 | 157 | 163 |
| <b>XII</b>  | <b>IV4.L98</b>  | 300 | 300 | 193 | 205 | 78 | 98 | 218 | 238 | 163 | 163 |
| <b>XII</b>  | <b>IV4.L99</b>  | 300 | 300 | 193 | 205 | 78 | 78 | 238 | 238 | 163 | 163 |
| <b>XII</b>  | <b>IV4.L100</b> | 300 | 300 | 193 | 205 | 78 | 98 | 238 | 238 | 163 | 163 |
| <b>XII</b>  | <b>IV4.L101</b> | 300 | 300 | 203 | 205 | 78 | 78 | 238 | 238 | 163 | 163 |
| <b>XII</b>  | <b>IV4.L102</b> | 300 | 300 | 203 | 205 | 78 | 98 | 218 | 238 | 163 | 163 |
| <b>XIII</b> | <b>IV4.L103</b> | 300 | 300 | 203 | 205 | 78 | 78 | 218 | 238 | 163 | 163 |
| <b>XIII</b> | <b>IV4.L104</b> | 300 | 300 | 203 | 205 | 78 | 78 | 218 | 218 | 163 | 163 |
| <b>XIII</b> | <b>IV4.L105</b> | 300 | 300 | 193 | 205 | 78 | 98 | 238 | 238 | 157 | 163 |
| <b>XIII</b> | <b>IV4.L106</b> | 300 | 300 | 193 | 205 | 78 | 98 | 238 | 238 | 163 | 163 |
| <b>XIV</b>  | <b>IV4.L107</b> | 300 | 300 | 203 | 205 | 78 | 98 | 238 | 238 | 163 | 163 |
| <b>XIV</b>  | <b>IV4.L108</b> | 300 | 300 | 193 | 205 | 78 | 78 | 218 | 218 | 157 | 163 |
| <b>XV</b>   | <b>IV4.L109</b> | 300 | 300 | 193 | 205 | 78 | 98 | 238 | 238 | 163 | 163 |

|              |                 |     |     |     |     |    |    |     |     |     |     |
|--------------|-----------------|-----|-----|-----|-----|----|----|-----|-----|-----|-----|
| <b>XV</b>    | <b>IV4.L110</b> | 300 | 300 | 193 | 205 | 78 | 98 | 218 | 218 | 157 | 163 |
| <b>XV</b>    | <b>IV4.L111</b> | 300 | 300 | 193 | 205 | 78 | 78 | 218 | 238 | 163 | 163 |
| <b>XV</b>    | <b>IV4.L112</b> | 300 | 300 | 193 | 205 | 78 | 98 | 218 | 218 | 157 | 163 |
| <b>XV</b>    | <b>IV4.L113</b> | 300 | 300 | 193 | 205 | 78 | 98 | 238 | 238 | 163 | 163 |
| <b>XV</b>    | <b>IV4.L114</b> | 300 | 300 | 203 | 205 | 78 | 98 | 218 | 218 | 157 | 163 |
| <b>XV</b>    | <b>IV4.L115</b> | 300 | 300 | 203 | 205 | 98 | 98 | 238 | 238 | 163 | 163 |
| <b>XV</b>    | <b>IV4.L116</b> | 300 | 300 | 193 | 205 | 78 | 98 | 218 | 218 | 163 | 163 |
| <b>XV</b>    | <b>IV4.L117</b> | 0   | 0   | 203 | 205 | 78 | 98 | 218 | 218 | 163 | 163 |
| <b>XV</b>    | <b>IV4.L118</b> | 300 | 300 | 193 | 205 | 78 | 98 | 218 | 218 | 163 | 163 |
| <b>XVI</b>   | <b>IV4.L119</b> | 300 | 300 | 193 | 205 | 98 | 98 | 218 | 238 | 157 | 163 |
| <b>XVI</b>   | <b>IV4.L120</b> | 300 | 300 | 203 | 205 | 78 | 98 | 218 | 238 | 157 | 163 |
| <b>XVI</b>   | <b>IV4.L121</b> | 300 | 300 | 193 | 205 | 78 | 78 | 218 | 238 | 163 | 163 |
| <b>XVI</b>   | <b>IV4.L122</b> | 300 | 300 | 193 | 205 | 78 | 78 | 238 | 238 | 157 | 163 |
| <b>XVI</b>   | <b>IV4.L123</b> | 300 | 300 | 193 | 205 | 78 | 78 | 218 | 218 | 157 | 163 |
| <b>XVII</b>  | <b>IV4.L124</b> | 300 | 300 | 193 | 205 | 98 | 98 | 218 | 238 | 157 | 163 |
| <b>XVIII</b> | <b>IV4.L125</b> | 300 | 300 | 203 | 205 | 78 | 78 | 218 | 238 | 163 | 163 |

**Table S5. The paternity assignment of experiment #1 using three microsatellite loci and Cervus v.3.0.6 software**

| <b>Offspring</b> | <b>NE-2P</b> | <b>Candidate father ID</b> | <b>Trio loci compared</b> | <b>Trio loci mismatching</b> | <b>Trio LOD score</b> | <b>Trio confidence</b> |
|------------------|--------------|----------------------------|---------------------------|------------------------------|-----------------------|------------------------|
| IV3.L01          | 5.93E-003    | M2                         | 3                         | 0                            | 4.56E+000             | *                      |
| IV3.L02          | 5.93E-003    | M2                         | 3                         | 0                            | 4.56E+000             | *                      |
| IV3.L03          | 1.50E-002    | M2                         | 3                         | 0                            | 3.49E+000             | *                      |
| IV3.L04          | 2.30E-003    | M2                         | 3                         | 0                            | 5.78E+000             | *                      |
| IV3.L05          | 1.22E-003    | M2                         | 3                         | 0                            | 6.17E+000             | *                      |
| IV3.L06          | 7.32E-002    | M2                         | 3                         | 0                            | 1.89E+000             | *                      |
| IV3.L07          | 2.44E-002    | M2                         | 3                         | 0                            | 2.65E+000             | *                      |
| IV3.L08          | 1.81E-002    | M2                         | 3                         | 0                            | 3.32E+000             | *                      |
| IV3.L09          | 3.73E-003    | M2                         | 3                         | 0                            | 4.93E+000             | *                      |
| IV3.L10          | 3.73E-003    | M2                         | 3                         | 0                            | 4.93E+000             | *                      |
| IV3.L11          | 7.32E-002    | M2                         | 3                         | 0                            | 1.88E+000             | *                      |
| IV3.L12          | 1.19E-001    | M2                         | 3                         | 0                            | 1.04E+000             | *                      |
| IV3.L13          | 2.44E-002    | M2                         | 3                         | 0                            | 2.65E+000             | *                      |
| IV3.L14          | 1.81E-002    | M2                         | 3                         | 0                            | 3.33E+000             | *                      |
| IV3.L15          | 2.30E-003    | M2                         | 3                         | 0                            | 5.77E+000             | *                      |
| IV3.L16          | 1.22E-003    | M2                         | 3                         | 0                            | 6.17E+000             | *                      |
| IV3.L17          | 1.22E-003    | M2                         | 3                         | 0                            | 6.18E+000             | *                      |
| IV3.L18          | 1.12E-002    | M2                         | 3                         | 0                            | 4.17E+000             | *                      |
| IV3.L19          | 5.93E-003    | M2                         | 3                         | 0                            | 4.55E+000             | *                      |
| IV3.L20          | 1.12E-002    | M2                         | 3                         | 0                            | 4.16E+000             | *                      |
| IV3.L21          | 1.12E-002    | M2                         | 3                         | 0                            | 4.17E+000             | *                      |
| IV3.L22          | 1.50E-002    | M2                         | 3                         | 0                            | 3.49E+000             | *                      |
| IV3.L23          | 2.30E-003    | M2                         | 3                         | 0                            | 5.77E+000             | *                      |
| IV3.L24          | 1.81E-002    | M2                         | 3                         | 0                            | 3.32E+000             | *                      |
| IV3.L25          | 9.07E-004    | M2                         | 3                         | 0                            | 6.83E+000             | *                      |
| IV3.L26          | 9.07E-004    | M2                         | 3                         | 0                            | 6.85E+000             | *                      |
| IV3.L27          | 5.93E-003    | M2                         | 3                         | 0                            | 4.55E+000             | *                      |
| IV3.L28          | 1.22E-003    | M2                         | 3                         | 0                            | 6.17E+000             | *                      |
| IV3.L29          | 1.86E-004    | M2                         | 3                         | 0                            | 8.45E+000             | *                      |
| IV3.L30          | 2.30E-003    | M2                         | 3                         | 0                            | 5.78E+000             | *                      |

| Offspring | NE-2P     | Candidate father ID | Trio loci compared | Trio loci mismatching | Trio LOD score | Trio confidence |
|-----------|-----------|---------------------|--------------------|-----------------------|----------------|-----------------|
| IV3.L31   | 2.44E-002 | M2                  | 3                  | 0                     | 2.65E+000      | *               |
| IV3.L32   | 2.30E-003 | M2                  | 3                  | 0                     | 5.78E+000      | *               |
| IV3.L33   | 3.73E-003 | M2                  | 3                  | 0                     | 4.93E+000      | *               |
| IV3.L34   | 1.19E-001 | M2                  | 3                  | 0                     | 1.04E+000      | *               |
| IV3.L35   | 7.32E-002 | M2                  | 3                  | 0                     | 1.89E+000      | *               |
| IV3.L36   | 1.22E-003 | M2                  | 3                  | 0                     | 6.17E+000      | *               |
| IV3.L37   | 1.86E-004 | M2                  | 3                  | 0                     | 8.44E+000      | *               |
| IV3.L38   | 1.19E-001 | M2                  | 3                  | 0                     | 1.04E+000      | *               |
| IV3.L39   | 9.07E-004 | M2                  | 3                  | 0                     | 6.85E+000      | *               |
| IV3.L40   | 5.93E-003 | M2                  | 3                  | 0                     | 4.57E+000      | *               |
| IV3.L41   | 1.22E-003 | M2                  | 3                  | 0                     | 6.17E+000      | *               |
| IV3.L42   | 2.44E-002 | M2                  | 3                  | 0                     | 2.65E+000      | *               |
| IV3.L43   | 1.86E-004 | M2                  | 3                  | 0                     | 8.46E+000      | *               |
| IV3.L44   | 1.50E-002 | M2                  | 3                  | 0                     | 3.49E+000      | *               |
| IV3.L45   | 5.93E-003 | M2                  | 3                  | 0                     | 4.56E+000      | *               |
| IV3.L46   | 1.50E-002 | M2                  | 3                  | 0                     | 3.49E+000      | *               |
| IV3.L47   | 2.30E-003 | M2                  | 3                  | 0                     | 5.77E+000      | *               |
| IV3.L48   | 1.19E-001 | M2                  | 3                  | 0                     | 1.04E+000      | *               |
| IV3.L49   | 5.93E-003 | M2                  | 3                  | 0                     | 4.55E+000      | *               |
| IV3.L50   | 2.44E-002 | M2                  | 3                  | 0                     | 2.65E+000      | *               |
| IV3.L51   | 1.19E-001 | M2                  | 3                  | 0                     | 1.04E+000      | *               |
| IV3.L52   | 1.81E-002 | M2                  | 3                  | 0                     | 3.33E+000      | *               |
| IV3.L53   | 1.50E-002 | M2                  | 3                  | 0                     | 3.49E+000      | *               |
| IV3.L54   | 9.07E-004 | M2                  | 3                  | 0                     | 6.85E+000      | *               |
| IV3.L55   | 9.07E-004 | M2                  | 3                  | 0                     | 6.85E+000      | *               |
| IV3.L56   | 1.19E-001 | M2                  | 3                  | 0                     | 1.04E+000      | *               |
| IV3.L57   | 2.30E-003 | M2                  | 3                  | 0                     | 5.77E+000      | *               |
| IV3.L58   | 1.86E-004 | M2                  | 3                  | 0                     | 8.44E+000      | *               |
| IV3.L59   | 5.93E-003 | M2                  | 3                  | 0                     | 4.56E+000      | *               |
| IV3.L60   | 1.50E-002 | M2                  | 3                  | 0                     | 3.49E+000      | *               |
| IV3.L61   | 5.93E-003 | M2                  | 3                  | 0                     | 4.57E+000      | *               |
| IV3.L62   | 5.93E-003 | M2                  | 3                  | 0                     | 4.55E+000      | *               |

| Offspring | NE-2P     | Candidate father ID | Trio loci compared | Trio loci mismatching | Trio LOD score | Trio confidence |
|-----------|-----------|---------------------|--------------------|-----------------------|----------------|-----------------|
| IV3.L63   | 1.86E-004 | M2                  | 3                  | 0                     | 8.45E+000      | *               |
| IV3.L64   | 3.73E-003 | M2                  | 3                  | 0                     | 4.93E+000      | *               |
| IV3.L65   | 1.19E-001 | M2                  | 3                  | 0                     | 1.04E+000      | *               |
| IV3.L66   | 1.19E-001 | M2                  | 3                  | 0                     | 1.04E+000      | *               |
| IV3.L67   | 1.19E-001 | M2                  | 3                  | 0                     | 1.04E+000      | *               |
| IV3.L68   | 7.32E-002 | M2                  | 3                  | 0                     | 1.89E+000      | *               |
| IV3.L69   | 1.12E-002 | M2                  | 3                  | 0                     | 4.16E+000      | *               |
| IV3.L70   | 1.22E-003 | M2                  | 3                  | 0                     | 6.18E+000      | *               |
| IV3.L71   | 1.12E-002 | M2                  | 3                  | 0                     | 4.17E+000      | *               |
| IV3.L72   | 7.32E-002 | M2                  | 3                  | 0                     | 1.89E+000      | *               |
| IV3.L73   | 1.81E-002 | M2                  | 3                  | 0                     | 3.32E+000      | *               |
| IV3.L74   | 9.07E-004 | M2                  | 3                  | 0                     | 6.83E+000      | *               |
| IV3.L75   | 1.22E-003 | M2                  | 3                  | 0                     | 6.18E+000      | *               |
| IV3.L76   | 1.19E-001 | M2                  | 3                  | 0                     | 1.04E+000      | *               |
| IV3.L77   | 1.19E-001 | M2                  | 3                  | 0                     | 1.04E+000      | *               |
| IV3.L78   | 1.22E-003 | M2                  | 3                  | 0                     | 6.17E+000      | *               |
| IV3.L79   | 3.73E-003 | M2                  | 3                  | 0                     | 4.93E+000      | *               |
| IV3.L80   | 1.81E-002 | M2                  | 3                  | 0                     | 3.32E+000      | *               |
| IV3.L81   | 1.22E-003 | M2                  | 3                  | 0                     | 6.18E+000      | *               |

**NE-2P:** second parent non-exclusion probability (first parent known); **Trio LOD score:** Log-likelihood ratio for a parents-offspring relationship between the known mother, the first candidate father and the offspring; \*: for strict confidence.

**Table S6. The paternity assignment of experiment #2 using five microsatellite loci and Cervus v.3.0.6 software**

| <b>Offspring</b> | <b>NE-2P</b> | <b>Candidate father ID</b> | <b>Trio loci compared</b> | <b>Trio loci mismatching</b> | <b>Trio LOD score</b> | <b>Trio confidence</b> |
|------------------|--------------|----------------------------|---------------------------|------------------------------|-----------------------|------------------------|
| IV4.L01          | 8.90E-002    | M2                         | 5                         | 0                            | 3.74E+000             | *                      |
| IV4.L02          | 2.86E-002    | M2                         | 5                         | 0                            | 4.70E+000             | *                      |
| IV4.L03          | 1.56E-001    | M2                         | 5                         | 0                            | 3.10E+000             | *                      |
| IV4.L04          | 2.86E-002    | M2                         | 5                         | 0                            | 4.70E+000             | *                      |
| IV4.L05          | 2.34E-002    | M2                         | 5                         | 0                            | 4.27E+000             | *                      |
| IV4.L06          | 1.28E-001    | M2                         | 5                         | 0                            | 2.66E+000             | *                      |
| IV4.L07          | 8.90E-002    | M2                         | 5                         | 0                            | 3.74E+000             | *                      |
| IV4.L08          | 1.56E-001    | M2                         | 5                         | 0                            | 3.09E+000             | *                      |
| IV4.L09          | 1.36E-002    | M2                         | 5                         | 0                            | 4.85E+000             | *                      |
| IV4.L10          | 2.86E-002    | M2                         | 5                         | 0                            | 4.70E+000             | *                      |
| IV4.L11          | 1.36E-002    | M2                         | 5                         | 0                            | 4.85E+000             | *                      |
| IV4.L12          | 2.34E-002    | M2                         | 5                         | 0                            | 4.27E+000             | *                      |
| IV4.L13          | 2.27E-002    | M2                         | 5                         | 0                            | 4.06E+000             | *                      |
| IV4.L14          | 8.90E-002    | M2                         | 5                         | 0                            | 3.74E+000             | *                      |
| IV4.L15          | 7.74E-003    | M2                         | 5                         | 0                            | 5.49E+000             | *                      |
| IV4.L16          | 8.90E-002    | M2                         | 5                         | 0                            | 3.74E+000             | *                      |
| IV4.L17          | 8.39E-002    | M2                         | 5                         | 0                            | 3.27E+000             | *                      |
| IV4.L18          | 8.90E-002    | M2                         | 5                         | 0                            | 3.74E+000             | *                      |
| IV4.L19          | 1.56E-001    | M2                         | 5                         | 0                            | 3.10E+000             | *                      |
| IV4.L20          | 1.56E-001    | M2                         | 5                         | 0                            | 3.10E+000             | *                      |
| IV4.L21          | 1.56E-001    | M2                         | 5                         | 0                            | 3.10E+000             | *                      |
| IV4.L22          | 8.90E-002    | M2                         | 5                         | 0                            | 3.74E+000             | *                      |
| IV4.L23          | 4.11E-002    | M2                         | 5                         | 0                            | 3.62E+000             | *                      |
| IV4.L24          | 8.39E-002    | M2                         | 5                         | 0                            | 3.27E+000             | *                      |
| IV4.L25          | 1.47E-001    | M2                         | 5                         | 0                            | 2.62E+000             | *                      |

| Offspring | NE-2P     | Candidate father ID | Trio loci compared | Trio loci mismatching | Trio LOD score | Trio confidence |
|-----------|-----------|---------------------|--------------------|-----------------------|----------------|-----------------|
| IV4.L26   | 1.28E-001 | M2                  | 5                  | 0                     | 2.66E+000      | *               |
| IV4.L27   | 1.36E-002 | M2                  | 5                  | 0                     | 4.85E+000      | *               |
| IV4.L28   | 6.87E-002 | M2                  | 5                  | 0                     | 2.83E+000      | *               |
| IV4.L29   | 2.86E-002 | M2                  | 5                  | 0                     | 4.70E+000      | *               |
| IV4.L30   | 1.56E-001 | M2                  | 5                  | 0                     | 3.10E+000      | *               |
| IV4.L31   | 8.90E-002 | M2                  | 5                  | 0                     | 3.74E+000      | *               |
| IV4.L32   | 7.29E-002 | M2                  | 5                  | 0                     | 3.31E+000      | *               |
| IV4.L33   | 2.86E-002 | M2                  | 5                  | 0                     | 4.70E+000      | *               |
| IV4.L34   | 1.47E-001 | M2                  | 5                  | 0                     | 2.62E+000      | *               |
| IV4.L35   | 7.29E-002 | M2                  | 5                  | 0                     | 3.30E+000      | *               |
| IV4.L36   | 1.36E-002 | M2                  | 5                  | 0                     | 4.85E+000      | *               |
| IV4.L37   | 2.27E-002 | M2                  | 5                  | 0                     | 4.06E+000      | *               |
| IV4.L38   | 8.39E-002 | M2                  | 5                  | 0                     | 3.27E+000      | *               |
| IV4.L39   | 1.69E-003 | M1                  | 5                  | 0                     | 7.14E+000      | *               |
| IV4.L40   | 8.90E-002 | M2                  | 5                  | 0                     | 3.74E+000      | *               |
| IV4.L41   | 7.29E-002 | M2                  | 5                  | 0                     | 3.30E+000      | *               |
| IV4.L42   | 6.87E-002 | M2                  | 5                  | 0                     | 2.83E+000      | *               |
| IV4.L43   | 3.99E-002 | M2                  | 5                  | 0                     | 3.41E+000      | *               |
| IV4.L44   | 1.47E-001 | M2                  | 5                  | 0                     | 2.62E+000      | *               |
| IV4.L45   | 8.90E-002 | M2                  | 5                  | 0                     | 3.74E+000      | *               |
| IV4.L46   | 4.11E-002 | M2                  | 5                  | 0                     | 3.62E+000      | *               |
| IV4.L47   | 5.02E-002 | M2                  | 5                  | 0                     | 4.06E+000      | *               |
| IV4.L48   | 8.90E-002 | M2                  | 5                  | 0                     | 3.74E+000      | *               |
| IV4.L49   | 1.47E-001 | M2                  | 5                  | 0                     | 2.62E+000      | *               |
| IV4.L50   | 8.90E-002 | M2                  | 5                  | 0                     | 3.74E+000      | *               |
| IV4.L51   | 4.11E-002 | M2                  | 5                  | 0                     | 3.62E+000      | *               |
| IV4.L52   | 3.99E-002 | M2                  | 5                  | 0                     | 3.41E+000      | *               |

| Offspring | NE-2P     | Candidate father ID | Trio loci compared | Trio loci mismatching | Trio LOD score | Trio confidence |
|-----------|-----------|---------------------|--------------------|-----------------------|----------------|-----------------|
| IV4.L53   | 1.56E-001 | M2                  | 5                  | 0                     | 3.10E+000      | *               |
| IV4.L54   | 4.23E-002 | M2                  | 5                  | 0                     | 3.89E+000      | *               |
| IV4.L55   | 1.47E-001 | M2                  | 5                  | 0                     | 2.62E+000      | *               |
| IV4.L56   | 5.02E-002 | M2                  | 5                  | 0                     | 4.06E+000      | *               |
| IV4.L57   | 8.39E-002 | M2                  | 5                  | 0                     | 3.27E+000      | *               |
| IV4.L58   | 8.90E-002 | M2                  | 5                  | 0                     | 3.74E+000      | *               |
| IV4.L59   | 4.11E-002 | M2                  | 5                  | 0                     | 3.62E+000      | *               |
| IV4.L60   | 1.36E-002 | M2                  | 5                  | 0                     | 4.85E+000      | *               |
| IV4.L61   | 1.47E-001 | M2                  | 5                  | 0                     | 2.62E+000      | *               |
| IV4.L62   | 8.90E-002 | M2                  | 5                  | 0                     | 3.74E+000      | *               |
| IV4.L63   | 5.02E-002 | M2                  | 5                  | 0                     | 4.06E+000      | *               |
| IV4.L64   | 1.56E-001 | M2                  | 5                  | 0                     | 3.10E+000      | *               |
| IV4.L65   | 7.74E-003 | M2                  | 5                  | 0                     | 5.49E+000      | *               |
| IV4.L66   | 1.47E-001 | M2                  | 5                  | 0                     | 2.62E+000      | *               |
| IV4.L67   | 2.27E-002 | M2                  | 5                  | 0                     | 4.06E+000      | *               |
| IV4.L68   | 4.23E-002 | M2                  | 5                  | 0                     | 3.89E+000      | *               |
| IV4.L69   | 1.47E-001 | M2                  | 5                  | 0                     | 2.62E+000      | *               |
| IV4.L70   | 1.28E-001 | M2                  | 5                  | 0                     | 2.66E+000      | *               |
| IV4.L71   | 8.39E-002 | M2                  | 5                  | 0                     | 3.27E+000      | *               |
| IV4.L72   | 8.90E-002 | M2                  | 5                  | 0                     | 3.74E+000      | *               |
| IV4.L73   | 2.27E-002 | M2                  | 5                  | 0                     | 4.06E+000      | *               |
| IV4.L74   | 2.41E-002 | M2                  | 5                  | 0                     | 4.53E+000      | *               |
| IV4.L75   | 1.21E-001 | M2                  | 5                  | 0                     | 2.18E+000      | *               |
| IV4.L76   | 1.28E-001 | M2                  | 5                  | 0                     | 2.66E+000      | *               |
| IV4.L77   | 4.23E-002 | M2                  | 5                  | 0                     | 3.89E+000      | *               |
| IV4.L78   | 1.28E-001 | M2                  | 5                  | 0                     | 2.66E+000      | *               |
| IV4.L79   | 2.86E-002 | M2                  | 5                  | 0                     | 4.70E+000      | *               |



| Offspring | NE-2P     | Candidate father ID | Trio loci compared | Trio loci mismatching | Trio LOD score | Trio confidence |
|-----------|-----------|---------------------|--------------------|-----------------------|----------------|-----------------|
| IV4.L80   | 8.90E-002 | M2                  | 5                  | 0                     | 3.74E+000      | *               |
| IV4.L81   | 1.56E-001 | M2                  | 5                  | 0                     | 3.10E+000      | *               |
| IV4.L82   | 1.56E-001 | M2                  | 5                  | 0                     | 3.09E+000      | *               |
| IV4.L83   | 2.86E-002 | M2                  | 5                  | 0                     | 4.70E+000      | *               |
| IV4.L84   | 4.11E-002 | M2                  | 5                  | 0                     | 3.62E+000      | *               |
| IV4.L85   | 1.77E-003 | M1                  | 5                  | 0                     | 6.83E+000      | *               |
| IV4.L86   | 2.86E-002 | M2                  | 5                  | 0                     | 4.70E+000      | *               |
| IV4.L87   | 1.47E-001 | M2                  | 5                  | 0                     | 2.62E+000      | *               |
| IV4.L88   | 1.28E-001 | M2                  | 5                  | 0                     | 2.66E+000      | *               |
| IV4.L89   | 8.39E-002 | M2                  | 5                  | 0                     | 3.27E+000      | *               |
| IV4.L90   | 2.86E-002 | M2                  | 5                  | 0                     | 4.70E+000      | *               |
| IV4.L91   | 1.21E-001 | M2                  | 5                  | 0                     | 2.18E+000      | *               |
| IV4.L92   | 5.02E-002 | M2                  | 5                  | 0                     | 4.06E+000      | *               |
| IV4.L93   | 1.28E-001 | M2                  | 5                  | 0                     | 2.66E+000      | *               |
| IV4.L94   | 2.86E-002 | M2                  | 5                  | 0                     | 4.70E+000      | *               |
| IV4.L95   | 2.34E-002 | M2                  | 5                  | 0                     | 4.26E+000      | *               |
| IV4.L96   | 1.47E-001 | M2                  | 5                  | 0                     | 2.62E+000      | *               |
| IV4.L97   | 8.90E-002 | M2                  | 5                  | 0                     | 3.74E+000      | *               |
| IV4.L98   | 1.56E-001 | M2                  | 5                  | 0                     | 3.09E+000      | *               |
| IV4.L99   | 4.11E-002 | M2                  | 5                  | 0                     | 3.62E+000      | *               |
| IV4.L100  | 5.02E-002 | M2                  | 5                  | 0                     | 4.06E+000      | *               |
| IV4.L101  | 4.11E-002 | M2                  | 5                  | 0                     | 3.62E+000      | *               |
| IV4.L102  | 1.56E-001 | M2                  | 5                  | 0                     | 3.10E+000      | *               |
| IV4.L103  | 1.28E-001 | M2                  | 5                  | 0                     | 2.66E+000      | *               |
| IV4.L104  | 1.21E-001 | M2                  | 5                  | 0                     | 2.19E+000      | *               |
| IV4.L105  | 2.86E-002 | M2                  | 5                  | 0                     | 4.70E+000      | *               |
| IV4.L106  | 5.02E-002 | M2                  | 5                  | 0                     | 4.06E+000      | *               |

| Offspring | NE-2P     | Candidate father ID | Trio loci compared | Trio loci mismatching | Trio LOD score | Trio confidence |
|-----------|-----------|---------------------|--------------------|-----------------------|----------------|-----------------|
| IV4.L107  | 5.02E-002 | M2                  | 5                  | 0                     | 4.06E+000      | *               |
| IV4.L108  | 6.87E-002 | M2                  | 5                  | 0                     | 2.83E+000      | *               |
| IV4.L109  | 5.02E-002 | M2                  | 5                  | 0                     | 4.06E+000      | *               |
| IV4.L110  | 8.39E-002 | M2                  | 5                  | 0                     | 3.27E+000      | *               |
| IV4.L111  | 1.28E-001 | M2                  | 5                  | 0                     | 2.66E+000      | *               |
| IV4.L112  | 8.39E-002 | M2                  | 5                  | 0                     | 3.27E+000      | *               |
| IV4.L113  | 5.02E-002 | M2                  | 5                  | 0                     | 4.06E+000      | *               |
| IV4.L114  | 8.39E-002 | M2                  | 5                  | 0                     | 3.27E+000      | *               |
| IV4.L115  | 1.36E-002 | M2                  | 5                  | 0                     | 4.85E+000      | *               |
| IV4.L116  | 1.47E-001 | M2                  | 5                  | 0                     | 2.62E+000      | *               |
| IV4.L117  | 2.04E-001 | M2                  | 4                  | 0                     | 1.88E+000      | *               |
| IV4.L118  | 1.47E-001 | M2                  | 5                  | 0                     | 2.62E+000      | *               |
| IV4.L119  | 2.41E-002 | M2                  | 5                  | 0                     | 4.53E+000      | *               |
| IV4.L120  | 8.90E-002 | M2                  | 5                  | 0                     | 3.74E+000      | *               |
| IV4.L121  | 1.28E-001 | M2                  | 5                  | 0                     | 2.66E+000      | *               |
| IV4.L122  | 2.34E-002 | M2                  | 5                  | 0                     | 4.26E+000      | *               |
| IV4.L123  | 6.87E-002 | M2                  | 5                  | 0                     | 2.83E+000      | *               |
| IV4.L124  | 2.41E-002 | M2                  | 5                  | 0                     | 4.53E+000      | *               |
| IV4.L125  | 1.28E-001 | M2                  | 5                  | 0                     | 2.66E+000      | *               |

**NE-2P**: second parent non-exclusion probability (first parent known); **Trio LOD score**: Log-likelihood ratio for a parents-offspring relationship between the known mother, the first candidate father and the offspring; \*: for strict confidence.

**Table S7. The paternity assignment of experiment #1 using Patri software**

Number of breeding males = 2

expected numbers of sampled offspring from sampled fathers: 81

non-zero probabilities of paternity for each mother-offspring pair:

| labels:        | group: | P(father)    | labels:        | group: | P(father)    |
|----------------|--------|--------------|----------------|--------|--------------|
| calf: IV3.L01  |        |              | calf: IV3.L08  |        |              |
| mother: IV3.F1 |        |              | mother: IV3.F1 |        |              |
| male: IV3.M2   | 0      | 1.000000E+00 | male: IV3.M2   | 0      | 1.000000E+00 |
|                | 0      | 1.000000E+00 |                | 0      | 1.000000E+00 |
|                | all    | 1.000000E+00 |                | all    | 1.000000E+00 |
| calf: IV3.L02  |        |              | calf: IV3.L09  |        |              |
| mother: IV3.F1 |        |              | mother: IV3.F1 |        |              |
| male: IV3.M2   | 0      | 1.000000E+00 | male: IV3.M2   | 0      | 1.000000E+00 |
|                | 0      | 1.000000E+00 |                | 0      | 1.000000E+00 |
|                | all    | 1.000000E+00 |                | all    | 1.000000E+00 |
| calf: IV3.L03  |        |              | calf: IV3.L10  |        |              |
| mother: IV3.F1 |        |              | mother: IV3.F1 |        |              |
| male: IV3.M2   | 0      | 1.000000E+00 | male: IV3.M2   | 0      | 1.000000E+00 |
|                | 0      | 1.000000E+00 |                | 0      | 1.000000E+00 |
|                | all    | 1.000000E+00 |                | all    | 1.000000E+00 |
| calf: IV3.L04  |        |              | calf: IV3.L11  |        |              |
| mother: IV3.F1 |        |              | mother: IV3.F1 |        |              |
| male: IV3.M2   | 0      | 1.000000E+00 | male: IV3.M2   | 0      | 1.000000E+00 |
|                | 0      | 1.000000E+00 |                | 0      | 1.000000E+00 |
|                | all    | 1.000000E+00 |                | all    | 1.000000E+00 |
| calf: IV3.L05  |        |              | calf: IV3.L12  |        |              |
| mother: IV3.F1 |        |              | mother: IV3.F1 |        |              |
| male: IV3.M2   | 0      | 1.000000E+00 | male: IV3.M2   | 0      | 1.000000E+00 |
|                | 0      | 1.000000E+00 |                | 0      | 1.000000E+00 |
|                | all    | 1.000000E+00 |                | all    | 1.000000E+00 |
| calf: IV3.L06  |        |              | calf: IV3.L13  |        |              |
| mother: IV3.F1 |        |              | mother: IV3.F1 |        |              |
| male: IV3.M2   | 0      | 1.000000E+00 | male: IV3.M2   | 0      | 1.000000E+00 |
|                | 0      | 1.000000E+00 |                | 0      | 1.000000E+00 |
|                | all    | 1.000000E+00 |                | all    | 1.000000E+00 |
| calf: IV3.L07  |        |              | calf: IV3.L14  |        |              |
| mother: IV3.F1 |        |              | mother: IV3.F1 |        |              |
| male: IV3.M2   | 0      | 1.000000E+00 | male: IV3.M2   | 0      | 1.000000E+00 |
|                | 0      | 1.000000E+00 |                | 0      | 1.000000E+00 |
|                | all    | 1.000000E+00 |                | all    | 1.000000E+00 |

| labels:        | group: | P(father)    |
|----------------|--------|--------------|
| calf: IV3.L15  |        |              |
| mother: IV3.F1 |        |              |
| male: IV3.M2   | 0      | 1.000000E+00 |
|                | 0      | 1.000000E+00 |
|                | all    | 1.000000E+00 |
| calf: IV3.L16  |        |              |
| mother: IV3.F1 |        |              |
| male: IV3.M2   | 0      | 1.000000E+00 |
|                | 0      | 1.000000E+00 |
|                | all    | 1.000000E+00 |
| calf: IV3.L17  |        |              |
| mother: IV3.F1 |        |              |
| male: IV3.M2   | 0      | 1.000000E+00 |
|                | 0      | 1.000000E+00 |
|                | all    | 1.000000E+00 |
| calf: IV3.L18  |        |              |
| mother: IV3.F1 |        |              |
| male: IV3.M2   | 0      | 1.000000E+00 |
|                | 0      | 1.000000E+00 |
|                | all    | 1.000000E+00 |
| calf: IV3.L19  |        |              |
| mother: IV3.F1 |        |              |
| male: IV3.M2   | 0      | 1.000000E+00 |
|                | 0      | 1.000000E+00 |
|                | all    | 1.000000E+00 |
| calf: IV3.L20  |        |              |
| mother: IV3.F1 |        |              |
| male: IV3.M2   | 0      | 1.000000E+00 |
|                | 0      | 1.000000E+00 |
|                | all    | 1.000000E+00 |
| calf: IV3.L21  |        |              |
| mother: IV3.F1 |        |              |
| male: IV3.M2   | 0      | 1.000000E+00 |
|                | 0      | 1.000000E+00 |
|                | all    | 1.000000E+00 |
| calf: IV3.L22  |        |              |
| mother: IV3.F1 |        |              |
| male: IV3.M2   | 0      | 1.000000E+00 |
|                | 0      | 1.000000E+00 |
|                | all    | 1.000000E+00 |
| calf: IV3.L23  |        |              |
| mother: IV3.F1 |        |              |
| male: IV3.M2   | 0      | 1.000000E+00 |
|                | 0      | 1.000000E+00 |
|                | all    | 1.000000E+00 |
| calf: IV3.L24  |        |              |
| mother: IV3.F1 |        |              |
| male: IV3.M2   | 0      | 1.000000E+00 |
|                | 0      | 1.000000E+00 |
|                | all    | 1.000000E+00 |

| labels:        | group: | P(father)    |
|----------------|--------|--------------|
| calf: IV3.L25  |        |              |
| mother: IV3.F1 |        |              |
| male: IV3.M2   | 0      | 1.000000E+00 |
|                | 0      | 1.000000E+00 |
|                | all    | 1.000000E+00 |
| calf: IV3.L26  |        |              |
| mother: IV3.F1 |        |              |
| male: IV3.M2   | 0      | 1.000000E+00 |
|                | 0      | 1.000000E+00 |
|                | all    | 1.000000E+00 |
| calf: IV3.L27  |        |              |
| mother: IV3.F1 |        |              |
| male: IV3.M2   | 0      | 1.000000E+00 |
|                | 0      | 1.000000E+00 |
|                | all    | 1.000000E+00 |
| calf: IV3.L28  |        |              |
| mother: IV3.F1 |        |              |
| male: IV3.M2   | 0      | 1.000000E+00 |
|                | 0      | 1.000000E+00 |
|                | all    | 1.000000E+00 |
| calf: IV3.L29  |        |              |
| mother: IV3.F1 |        |              |
| male: IV3.M2   | 0      | 1.000000E+00 |
|                | 0      | 1.000000E+00 |
|                | all    | 1.000000E+00 |
| calf: IV3.L30  |        |              |
| mother: IV3.F1 |        |              |
| male: IV3.M2   | 0      | 1.000000E+00 |
|                | 0      | 1.000000E+00 |
|                | all    | 1.000000E+00 |
| calf: IV3.L31  |        |              |
| mother: IV3.F1 |        |              |
| male: IV3.M2   | 0      | 1.000000E+00 |
|                | 0      | 1.000000E+00 |
|                | all    | 1.000000E+00 |
| calf: IV3.L32  |        |              |
| mother: IV3.F1 |        |              |
| male: IV3.M2   | 0      | 1.000000E+00 |
|                | 0      | 1.000000E+00 |
|                | all    | 1.000000E+00 |
| calf: IV3.L33  |        |              |
| mother: IV3.F1 |        |              |
| male: IV3.M2   | 0      | 1.000000E+00 |
|                | 0      | 1.000000E+00 |
|                | all    | 1.000000E+00 |
| calf: IV3.L34  |        |              |
| mother: IV3.F1 |        |              |
| male: IV3.M2   | 0      | 1.000000E+00 |
|                | 0      | 1.000000E+00 |
|                | all    | 1.000000E+00 |

| labels:        | group: P(father) |
|----------------|------------------|
| calf: IV3.L35  |                  |
| mother: IV3.F1 |                  |
| male: IV3.M2   | 0 1.000000E+00   |
|                | 0 1.000000E+00   |
|                | all 1.000000E+00 |
| calf: IV3.L36  |                  |
| mother: IV3.F1 |                  |
| male: IV3.M2   | 0 1.000000E+00   |
|                | 0 1.000000E+00   |
|                | all 1.000000E+00 |
| calf: IV3.L37  |                  |
| mother: IV3.F1 |                  |
| male: IV3.M2   | 0 1.000000E+00   |
|                | 0 1.000000E+00   |
|                | all 1.000000E+00 |
| calf: IV3.L38  |                  |
| mother: IV3.F1 |                  |
| male: IV3.M2   | 0 1.000000E+00   |
|                | 0 1.000000E+00   |
|                | all 1.000000E+00 |
| calf: IV3.L39  |                  |
| mother: IV3.F1 |                  |
| male: IV3.M2   | 0 1.000000E+00   |
|                | 0 1.000000E+00   |
|                | all 1.000000E+00 |
| calf: IV3.L40  |                  |
| mother: IV3.F1 |                  |
| male: IV3.M2   | 0 1.000000E+00   |
|                | 0 1.000000E+00   |
|                | all 1.000000E+00 |
| calf: IV3.L41  |                  |
| mother: IV3.F1 |                  |
| male: IV3.M2   | 0 1.000000E+00   |
|                | 0 1.000000E+00   |
|                | all 1.000000E+00 |
| calf: IV3.L42  |                  |
| mother: IV3.F1 |                  |
| male: IV3.M2   | 0 1.000000E+00   |
|                | 0 1.000000E+00   |
|                | all 1.000000E+00 |
| calf: IV3.L43  |                  |
| mother: IV3.F1 |                  |
| male: IV3.M2   | 0 1.000000E+00   |
|                | 0 1.000000E+00   |
|                | all 1.000000E+00 |
| calf: IV3.L44  |                  |
| mother: IV3.F1 |                  |
| male: IV3.M2   | 0 1.000000E+00   |
|                | 0 1.000000E+00   |
|                | all 1.000000E+00 |

| labels:        | group: P(father) |
|----------------|------------------|
| calf: IV3.L45  |                  |
| mother: IV3.F1 |                  |
| male: IV3.M2   | 0 1.000000E+00   |
|                | 0 1.000000E+00   |
|                | all 1.000000E+00 |
| calf: IV3.L46  |                  |
| mother: IV3.F1 |                  |
| male: IV3.M2   | 0 1.000000E+00   |
|                | 0 1.000000E+00   |
|                | all 1.000000E+00 |
| calf: IV3.L47  |                  |
| mother: IV3.F1 |                  |
| male: IV3.M2   | 0 1.000000E+00   |
|                | 0 1.000000E+00   |
|                | all 1.000000E+00 |
| calf: IV3.L48  |                  |
| mother: IV3.F1 |                  |
| male: IV3.M2   | 0 1.000000E+00   |
|                | 0 1.000000E+00   |
|                | all 1.000000E+00 |
| calf: IV3.L49  |                  |
| mother: IV3.F1 |                  |
| male: IV3.M2   | 0 1.000000E+00   |
|                | 0 1.000000E+00   |
|                | all 1.000000E+00 |
| calf: IV3.L50  |                  |
| mother: IV3.F1 |                  |
| male: IV3.M2   | 0 1.000000E+00   |
|                | 0 1.000000E+00   |
|                | all 1.000000E+00 |
| calf: IV3.L51  |                  |
| mother: IV3.F1 |                  |
| male: IV3.M2   | 0 1.000000E+00   |
|                | 0 1.000000E+00   |
|                | all 1.000000E+00 |
| calf: IV3.L52  |                  |
| mother: IV3.F1 |                  |
| male: IV3.M2   | 0 1.000000E+00   |
|                | 0 1.000000E+00   |
|                | all 1.000000E+00 |
| calf: IV3.L53  |                  |
| mother: IV3.F1 |                  |
| male: IV3.M2   | 0 1.000000E+00   |
|                | 0 1.000000E+00   |
|                | all 1.000000E+00 |
| calf: IV3.L54  |                  |
| mother: IV3.F1 |                  |
| male: IV3.M2   | 0 1.000000E+00   |
|                | 0 1.000000E+00   |
|                | all 1.000000E+00 |

| labels:        | group: P(father) |
|----------------|------------------|
| calf: IV3.L55  |                  |
| mother: IV3.F1 |                  |
| male: IV3.M2   | 0 1.000000E+00   |
|                | 0 1.000000E+00   |
|                | all 1.000000E+00 |
| calf: IV3.L56  |                  |
| mother: IV3.F1 |                  |
| male: IV3.M2   | 0 1.000000E+00   |
|                | 0 1.000000E+00   |
|                | all 1.000000E+00 |
| calf: IV3.L57  |                  |
| mother: IV3.F1 |                  |
| male: IV3.M2   | 0 1.000000E+00   |
|                | 0 1.000000E+00   |
|                | all 1.000000E+00 |
| calf: IV3.L58  |                  |
| mother: IV3.F1 |                  |
| male: IV3.M2   | 0 1.000000E+00   |
|                | 0 1.000000E+00   |
|                | all 1.000000E+00 |
| calf: IV3.L59  |                  |
| mother: IV3.F1 |                  |
| male: IV3.M2   | 0 1.000000E+00   |
|                | 0 1.000000E+00   |
|                | all 1.000000E+00 |
| calf: IV3.L60  |                  |
| mother: IV3.F1 |                  |
| male: IV3.M2   | 0 1.000000E+00   |
|                | 0 1.000000E+00   |
|                | all 1.000000E+00 |
| calf: IV3.L61  |                  |
| mother: IV3.F1 |                  |
| male: IV3.M2   | 0 1.000000E+00   |
|                | 0 1.000000E+00   |
|                | all 1.000000E+00 |
| calf: IV3.L62  |                  |
| mother: IV3.F1 |                  |
| male: IV3.M2   | 0 1.000000E+00   |
|                | 0 1.000000E+00   |
|                | all 1.000000E+00 |
| calf: IV3.L63  |                  |
| mother: IV3.F1 |                  |
| male: IV3.M2   | 0 1.000000E+00   |
|                | 0 1.000000E+00   |
|                | all 1.000000E+00 |
| calf: IV3.L64  |                  |
| mother: IV3.F1 |                  |
| male: IV3.M2   | 0 1.000000E+00   |
|                | 0 1.000000E+00   |
|                | all 1.000000E+00 |

| labels:        | group: P(father) |
|----------------|------------------|
| calf: IV3.L65  |                  |
| mother: IV3.F1 |                  |
| male: IV3.M2   | 0 1.000000E+00   |
|                | 0 1.000000E+00   |
|                | all 1.000000E+00 |
| calf: IV3.L66  |                  |
| mother: IV3.F1 |                  |
| male: IV3.M2   | 0 1.000000E+00   |
|                | 0 1.000000E+00   |
|                | all 1.000000E+00 |
| calf: IV3.L67  |                  |
| mother: IV3.F1 |                  |
| male: IV3.M2   | 0 1.000000E+00   |
|                | 0 1.000000E+00   |
|                | all 1.000000E+00 |
| calf: IV3.L68  |                  |
| mother: IV3.F1 |                  |
| male: IV3.M2   | 0 1.000000E+00   |
|                | 0 1.000000E+00   |
|                | all 1.000000E+00 |
| calf: IV3.L69  |                  |
| mother: IV3.F1 |                  |
| male: IV3.M2   | 0 1.000000E+00   |
|                | 0 1.000000E+00   |
|                | all 1.000000E+00 |
| calf: IV3.L70  |                  |
| mother: IV3.F1 |                  |
| male: IV3.M2   | 0 1.000000E+00   |
|                | 0 1.000000E+00   |
|                | all 1.000000E+00 |
| calf: IV3.L71  |                  |
| mother: IV3.F1 |                  |
| male: IV3.M2   | 0 1.000000E+00   |
|                | 0 1.000000E+00   |
|                | all 1.000000E+00 |
| calf: IV3.L72  |                  |
| mother: IV3.F1 |                  |
| male: IV3.M2   | 0 1.000000E+00   |
|                | 0 1.000000E+00   |
|                | all 1.000000E+00 |
| calf: IV3.L73  |                  |
| mother: IV3.F1 |                  |
| male: IV3.M2   | 0 1.000000E+00   |
|                | 0 1.000000E+00   |
|                | all 1.000000E+00 |
| calf: IV3.L74  |                  |
| mother: IV3.F1 |                  |
| male: IV3.M2   | 0 1.000000E+00   |
|                | 0 1.000000E+00   |
|                | all 1.000000E+00 |

| labels:        | group: | P(father)    |
|----------------|--------|--------------|
| calf: IV3.L75  |        |              |
| mother: IV3.F1 |        |              |
| male: IV3.M2   | 0      | 1.000000E+00 |
|                | 0      | 1.000000E+00 |
|                | all    | 1.000000E+00 |
| calf: IV3.L76  |        |              |
| mother: IV3.F1 |        |              |
| male: IV3.M2   | 0      | 1.000000E+00 |
|                | 0      | 1.000000E+00 |
|                | all    | 1.000000E+00 |
| calf: IV3.L77  |        |              |
| mother: IV3.F1 |        |              |
| male: IV3.M2   | 0      | 1.000000E+00 |
|                | 0      | 1.000000E+00 |
|                | all    | 1.000000E+00 |
| calf: IV3.L78  |        |              |
| mother: IV3.F1 |        |              |
| male: IV3.M2   | 0      | 1.000000E+00 |
|                | 0      | 1.000000E+00 |
|                | all    | 1.000000E+00 |
| calf: IV3.L79  |        |              |
| mother: IV3.F1 |        |              |
| male: IV3.M2   | 0      | 1.000000E+00 |
|                | 0      | 1.000000E+00 |
|                | all    | 1.000000E+00 |
| calf: IV3.L80  |        |              |
| mother: IV3.F1 |        |              |
| male: IV3.M2   | 0      | 1.000000E+00 |
|                | 0      | 1.000000E+00 |
|                | all    | 1.000000E+00 |
| calf: IV3.L81  |        |              |
| mother: IV3.F1 |        |              |
| male: IV3.M2   | 0      | 1.000000E+00 |
|                | 0      | 1.000000E+00 |
|                | all    | 1.000000E+00 |

### Legend:

<offspring ID>

<mother ID>

<male x ID>

<group of male x>

<Probability of male x is the father>

<group y>

< Probability of male x belongs to group y>

all

< Probability of male x has been sampled>

**Table S8. The paternity assignment of experiment #2 using Patri software**

Number of breeding males = 2

expected numbers of sampled offspring from sampled fathers: 125

non-zero probabilities of paternity for each mother-offspring pair:

| labels:        | group: | P(father)    | labels:        | group: | P(father)    |
|----------------|--------|--------------|----------------|--------|--------------|
| calf: IV4.L01  |        |              | calf: IV4.L09  |        |              |
| mother: IV4.F1 |        |              | mother: IV4.F1 |        |              |
| male: IV4.M2   | 0      | 1.000000E+00 | male: IV4.M2   | 0      | 1.000000E+00 |
|                | 0      | 1.000000E+00 |                | 0      | 1.000000E+00 |
|                | all    | 1.000000E+00 |                | all    | 1.000000E+00 |
| calf: IV4.L02  |        |              | calf: IV4.L10  |        |              |
| mother: IV4.F1 |        |              | mother: IV4.F1 |        |              |
| male: IV4.M2   | 0      | 1.000000E+00 | male: IV4.M2   | 0      | 1.000000E+00 |
|                | 0      | 1.000000E+00 |                | 0      | 1.000000E+00 |
|                | all    | 1.000000E+00 |                | all    | 1.000000E+00 |
| calf: IV4.L03  |        |              | calf: IV4.L11  |        |              |
| mother: IV4.F1 |        |              | mother: IV4.F1 |        |              |
| male: IV4.M2   | 0      | 1.000000E+00 | male: IV4.M2   | 0      | 1.000000E+00 |
|                | 0      | 1.000000E+00 |                | 0      | 1.000000E+00 |
|                | all    | 1.000000E+00 |                | all    | 1.000000E+00 |
| calf: IV4.L04  |        |              | calf: IV4.L12  |        |              |
| mother: IV4.F1 |        |              | mother: IV4.F1 |        |              |
| male: IV4.M2   | 0      | 1.000000E+00 | male: IV4.M2   | 0      | 1.000000E+00 |
|                | 0      | 1.000000E+00 |                | 0      | 1.000000E+00 |
|                | all    | 1.000000E+00 |                | all    | 1.000000E+00 |
| calf: IV4.L05  |        |              | calf: IV4.L13  |        |              |
| mother: IV4.F1 |        |              | mother: IV4.F1 |        |              |
| male: IV4.M2   | 0      | 1.000000E+00 | male: IV4.M2   | 0      | 1.000000E+00 |
|                | 0      | 1.000000E+00 |                | 0      | 1.000000E+00 |
|                | all    | 1.000000E+00 |                | all    | 1.000000E+00 |
| calf: IV4.L06  |        |              | calf: IV4.L14  |        |              |
| mother: IV4.F1 |        |              | mother: IV4.F1 |        |              |
| male: IV4.M2   | 0      | 1.000000E+00 | male: IV4.M2   | 0      | 1.000000E+00 |
|                | 0      | 1.000000E+00 |                | 0      | 1.000000E+00 |
|                | all    | 1.000000E+00 |                | all    | 1.000000E+00 |
| calf: IV4.L07  |        |              | calf: IV4.L15  |        |              |
| mother: IV4.F1 |        |              | mother: IV4.F1 |        |              |
| male: IV4.M2   | 0      | 1.000000E+00 | male: IV4.M2   | 0      | 1.000000E+00 |
|                | 0      | 1.000000E+00 |                | 0      | 1.000000E+00 |
|                | all    | 1.000000E+00 |                | all    | 1.000000E+00 |
| calf: IV4.L08  |        |              | calf: IV4.L16  |        |              |
| mother: IV4.F1 |        |              | mother: IV4.F1 |        |              |
| male: IV4.M2   | 0      | 1.000000E+00 | male: IV4.M2   | 0      | 1.000000E+00 |
|                | 0      | 1.000000E+00 |                | 0      | 1.000000E+00 |
|                | all    | 1.000000E+00 |                | all    | 1.000000E+00 |
| calf: IV4.L17  |        |              | calf: IV4.L27  |        |              |
| mother: IV4.F1 |        |              | mother: IV4.F1 |        |              |
| male: IV4.M2   | 0      | 1.000000E+00 | male: IV4.M2   | 0      | 1.000000E+00 |
|                | 0      | 1.000000E+00 |                | 0      | 1.000000E+00 |



| labels:        | group: | P(father)    | labels:        | group: | P(father)    |
|----------------|--------|--------------|----------------|--------|--------------|
|                | all    | 1.000000E+00 |                | all    | 1.000000E+00 |
| calf: IV4.L18  |        |              | calf: IV4.L28  |        |              |
| mother: IV4.F1 |        |              | mother: IV4.F1 |        |              |
| male: IV4.M2   | 0      | 1.000000E+00 | male: IV4.M2   | 0      | 1.000000E+00 |
|                | 0      | 1.000000E+00 |                | 0      | 1.000000E+00 |
|                | all    | 1.000000E+00 |                | all    | 1.000000E+00 |
| calf: IV4.L19  |        |              | calf: IV4.L29  |        |              |
| mother: IV4.F1 |        |              | mother: IV4.F1 |        |              |
| male: IV4.M2   | 0      | 1.000000E+00 | male: IV4.M2   | 0      | 1.000000E+00 |
|                | 0      | 1.000000E+00 |                | 0      | 1.000000E+00 |
|                | all    | 1.000000E+00 |                | all    | 1.000000E+00 |
| calf: IV4.L20  |        |              | calf: IV4.L30  |        |              |
| mother: IV4.F1 |        |              | mother: IV4.F1 |        |              |
| male: IV4.M2   | 0      | 1.000000E+00 | male: IV4.M2   | 0      | 1.000000E+00 |
|                | 0      | 1.000000E+00 |                | 0      | 1.000000E+00 |
|                | all    | 1.000000E+00 |                | all    | 1.000000E+00 |
| calf: IV4.L21  |        |              | calf: IV4.L31  |        |              |
| mother: IV4.F1 |        |              | mother: IV4.F1 |        |              |
| male: IV4.M2   | 0      | 1.000000E+00 | male: IV4.M2   | 0      | 1.000000E+00 |
|                | 0      | 1.000000E+00 |                | 0      | 1.000000E+00 |
|                | all    | 1.000000E+00 |                | all    | 1.000000E+00 |
| calf: IV4.L22  |        |              | calf: IV4.L32  |        |              |
| mother: IV4.F1 |        |              | mother: IV4.F1 |        |              |
| male: IV4.M2   | 0      | 1.000000E+00 | male: IV4.M2   | 0      | 1.000000E+00 |
|                | 0      | 1.000000E+00 |                | 0      | 1.000000E+00 |
|                | all    | 1.000000E+00 |                | all    | 1.000000E+00 |
| calf: IV4.L23  |        |              | calf: IV4.L33  |        |              |
| mother: IV4.F1 |        |              | mother: IV4.F1 |        |              |
| male: IV4.M2   | 0      | 1.000000E+00 | male: IV4.M2   | 0      | 1.000000E+00 |
|                | 0      | 1.000000E+00 |                | 0      | 1.000000E+00 |
|                | all    | 1.000000E+00 |                | all    | 1.000000E+00 |
| calf: IV4.L24  |        |              | calf: IV4.L34  |        |              |
| mother: IV4.F1 |        |              | mother: IV4.F1 |        |              |
| male: IV4.M2   | 0      | 1.000000E+00 | male: IV4.M2   | 0      | 1.000000E+00 |
|                | 0      | 1.000000E+00 |                | 0      | 1.000000E+00 |
|                | all    | 1.000000E+00 |                | all    | 1.000000E+00 |
| calf: IV4.L25  |        |              | calf: IV4.L35  |        |              |
| mother: IV4.F1 |        |              | mother: IV4.F1 |        |              |
| male: IV4.M2   | 0      | 1.000000E+00 | male: IV4.M2   | 0      | 1.000000E+00 |
|                | 0      | 1.000000E+00 |                | 0      | 1.000000E+00 |
|                | all    | 1.000000E+00 |                | all    | 1.000000E+00 |
| calf: IV4.L26  |        |              | calf: IV4.L36  |        |              |
| mother: IV4.F1 |        |              | mother: IV4.F1 |        |              |
| male: IV4.M2   | 0      | 1.000000E+00 | male: IV4.M2   | 0      | 1.000000E+00 |
|                | 0      | 1.000000E+00 |                | 0      | 1.000000E+00 |
|                | all    | 1.000000E+00 |                | all    | 1.000000E+00 |
| calf: IV4.L37  |        |              | calf: IV4.L47  |        |              |
| mother: IV4.F1 |        |              | mother: IV4.F1 |        |              |
| male: IV4.M2   | 0      | 1.000000E+00 | male: IV4.M2   | 0      | 1.000000E+00 |
|                | 0      | 1.000000E+00 |                | 0      | 1.000000E+00 |
|                | all    | 1.000000E+00 |                | all    | 1.000000E+00 |

| labels:        | group: | P(father)    | labels:        | group: | P(father)    |
|----------------|--------|--------------|----------------|--------|--------------|
| calf: IV4.L38  |        |              | calf: IV4.L48  |        |              |
| mother: IV4.F1 |        |              | mother: IV4.F1 |        |              |
| male: IV4.M2   | 0      | 1.000000E+00 | male: IV4.M2   | 0      | 1.000000E+00 |
|                | 0      | 1.000000E+00 |                | 0      | 1.000000E+00 |
|                | all    | 1.000000E+00 |                | all    | 1.000000E+00 |
| calf: IV4.L39  |        |              | calf: IV4.L49  |        |              |
| mother: IV4.F1 |        |              | mother: IV4.F1 |        |              |
| male: IV4.M1   | 0      | 1.000000E+00 | male: IV4.M2   | 0      | 1.000000E+00 |
|                | 0      | 1.000000E+00 |                | 0      | 1.000000E+00 |
|                | all    | 1.000000E+00 |                | all    | 1.000000E+00 |
| calf: IV4.L40  |        |              | calf: IV4.L50  |        |              |
| mother: IV4.F1 |        |              | mother: IV4.F1 |        |              |
| male: IV4.M2   | 0      | 1.000000E+00 | male: IV4.M2   | 0      | 1.000000E+00 |
|                | 0      | 1.000000E+00 |                | 0      | 1.000000E+00 |
|                | all    | 1.000000E+00 |                | all    | 1.000000E+00 |
| calf: IV4.L41  |        |              | calf: IV4.L51  |        |              |
| mother: IV4.F1 |        |              | mother: IV4.F1 |        |              |
| male: IV4.M2   | 0      | 1.000000E+00 | male: IV4.M2   | 0      | 1.000000E+00 |
|                | 0      | 1.000000E+00 |                | 0      | 1.000000E+00 |
|                | all    | 1.000000E+00 |                | all    | 1.000000E+00 |
| calf: IV4.L42  |        |              | calf: IV4.L52  |        |              |
| mother: IV4.F1 |        |              | mother: IV4.F1 |        |              |
| male: IV4.M2   | 0      | 1.000000E+00 | male: IV4.M2   | 0      | 1.000000E+00 |
|                | 0      | 1.000000E+00 |                | 0      | 1.000000E+00 |
|                | all    | 1.000000E+00 |                | all    | 1.000000E+00 |
| calf: IV4.L43  |        |              | calf: IV4.L53  |        |              |
| mother: IV4.F1 |        |              | mother: IV4.F1 |        |              |
| male: IV4.M2   | 0      | 1.000000E+00 | male: IV4.M2   | 0      | 1.000000E+00 |
|                | 0      | 1.000000E+00 |                | 0      | 1.000000E+00 |
|                | all    | 1.000000E+00 |                | all    | 1.000000E+00 |
| calf: IV4.L44  |        |              | calf: IV4.L54  |        |              |
| mother: IV4.F1 |        |              | mother: IV4.F1 |        |              |
| male: IV4.M2   | 0      | 1.000000E+00 | male: IV4.M2   | 0      | 1.000000E+00 |
|                | 0      | 1.000000E+00 |                | 0      | 1.000000E+00 |
|                | all    | 1.000000E+00 |                | all    | 1.000000E+00 |
| calf: IV4.L45  |        |              | calf: IV4.L55  |        |              |
| mother: IV4.F1 |        |              | mother: IV4.F1 |        |              |
| male: IV4.M2   | 0      | 1.000000E+00 | male: IV4.M2   | 0      | 1.000000E+00 |
|                | 0      | 1.000000E+00 |                | 0      | 1.000000E+00 |
|                | all    | 1.000000E+00 |                | all    | 1.000000E+00 |
| calf: IV4.L46  |        |              | calf: IV4.L56  |        |              |
| mother: IV4.F1 |        |              | mother: IV4.F1 |        |              |
| male: IV4.M2   | 0      | 1.000000E+00 | male: IV4.M2   | 0      | 1.000000E+00 |
|                | 0      | 1.000000E+00 |                | 0      | 1.000000E+00 |
|                | all    | 1.000000E+00 |                | all    | 1.000000E+00 |
| calf: IV4.L57  |        |              | calf: IV4.L67  |        |              |
| mother: IV4.F1 |        |              | mother: IV4.F1 |        |              |
| male: IV4.M2   | 0      | 1.000000E+00 | male: IV4.M2   | 0      | 1.000000E+00 |
|                | 0      | 1.000000E+00 |                | 0      | 1.000000E+00 |
|                | all    | 1.000000E+00 |                | all    | 1.000000E+00 |

| labels:        | group: | P(father)    | labels:        | group: | P(father)    |
|----------------|--------|--------------|----------------|--------|--------------|
| calf: IV4.L58  |        |              | calf: IV4.L68  |        |              |
| mother: IV4.F1 |        |              | mother: IV4.F1 |        |              |
| male: IV4.M2   | 0      | 1.000000E+00 | male: IV4.M2   | 0      | 1.000000E+00 |
|                | 0      | 1.000000E+00 |                | 0      | 1.000000E+00 |
|                | all    | 1.000000E+00 |                | all    | 1.000000E+00 |
| calf: IV4.L59  |        |              | calf: IV4.L69  |        |              |
| mother: IV4.F1 |        |              | mother: IV4.F1 |        |              |
| male: IV4.M2   | 0      | 1.000000E+00 | male: IV4.M2   | 0      | 1.000000E+00 |
|                | 0      | 1.000000E+00 |                | 0      | 1.000000E+00 |
|                | all    | 1.000000E+00 |                | all    | 1.000000E+00 |
| calf: IV4.L60  |        |              | calf: IV4.L70  |        |              |
| mother: IV4.F1 |        |              | mother: IV4.F1 |        |              |
| male: IV4.M2   | 0      | 1.000000E+00 | male: IV4.M2   | 0      | 1.000000E+00 |
|                | 0      | 1.000000E+00 |                | 0      | 1.000000E+00 |
|                | all    | 1.000000E+00 |                | all    | 1.000000E+00 |
| calf: IV4.L61  |        |              | calf: IV4.L71  |        |              |
| mother: IV4.F1 |        |              | mother: IV4.F1 |        |              |
| male: IV4.M2   | 0      | 1.000000E+00 | male: IV4.M2   | 0      | 1.000000E+00 |
|                | 0      | 1.000000E+00 |                | 0      | 1.000000E+00 |
|                | all    | 1.000000E+00 |                | all    | 1.000000E+00 |
| calf: IV4.L62  |        |              | calf: IV4.L72  |        |              |
| mother: IV4.F1 |        |              | mother: IV4.F1 |        |              |
| male: IV4.M2   | 0      | 1.000000E+00 | male: IV4.M2   | 0      | 1.000000E+00 |
|                | 0      | 1.000000E+00 |                | 0      | 1.000000E+00 |
|                | all    | 1.000000E+00 |                | all    | 1.000000E+00 |
| calf: IV4.L63  |        |              | calf: IV4.L73  |        |              |
| mother: IV4.F1 |        |              | mother: IV4.F1 |        |              |
| male: IV4.M2   | 0      | 1.000000E+00 | male: IV4.M2   | 0      | 1.000000E+00 |
|                | 0      | 1.000000E+00 |                | 0      | 1.000000E+00 |
|                | all    | 1.000000E+00 |                | all    | 1.000000E+00 |
| calf: IV4.L64  |        |              | calf: IV4.L74  |        |              |
| mother: IV4.F1 |        |              | mother: IV4.F1 |        |              |
| male: IV4.M2   | 0      | 1.000000E+00 | male: IV4.M2   | 0      | 1.000000E+00 |
|                | 0      | 1.000000E+00 |                | 0      | 1.000000E+00 |
|                | all    | 1.000000E+00 |                | all    | 1.000000E+00 |
| calf: IV4.L65  |        |              | calf: IV4.L75  |        |              |
| mother: IV4.F1 |        |              | mother: IV4.F1 |        |              |
| male: IV4.M2   | 0      | 1.000000E+00 | male: IV4.M2   | 0      | 1.000000E+00 |
|                | 0      | 1.000000E+00 |                | 0      | 1.000000E+00 |
|                | all    | 1.000000E+00 |                | all    | 1.000000E+00 |
| calf: IV4.L66  |        |              | calf: IV4.L76  |        |              |
| mother: IV4.F1 |        |              | mother: IV4.F1 |        |              |
| male: IV4.M2   | 0      | 1.000000E+00 | male: IV4.M2   | 0      | 1.000000E+00 |
|                | 0      | 1.000000E+00 |                | 0      | 1.000000E+00 |
|                | all    | 1.000000E+00 |                | all    | 1.000000E+00 |
| calf: IV4.L77  |        |              | calf: IV4.L87  |        |              |
| mother: IV4.F1 |        |              | mother: IV4.F1 |        |              |
| male: IV4.M2   | 0      | 1.000000E+00 | male: IV4.M2   | 0      | 1.000000E+00 |
|                | 0      | 1.000000E+00 |                | 0      | 1.000000E+00 |
|                | all    | 1.000000E+00 |                | all    | 1.000000E+00 |
| calf: IV4.L78  |        |              | calf: IV4.L88  |        |              |

| labels:        | group: | P(father)    | labels:        | group: | P(father)    |
|----------------|--------|--------------|----------------|--------|--------------|
| mother: IV4.F1 |        |              | mother: IV4.F1 |        |              |
| male: IV4.M2   | 0      | 1.000000E+00 | male: IV4.M2   | 0      | 1.000000E+00 |
|                | 0      | 1.000000E+00 |                | 0      | 1.000000E+00 |
|                | all    | 1.000000E+00 |                | all    | 1.000000E+00 |
| calf: IV4.L79  |        |              | calf: IV4.L89  |        |              |
| mother: IV4.F1 |        |              | mother: IV4.F1 |        |              |
| male: IV4.M2   | 0      | 1.000000E+00 | male: IV4.M2   | 0      | 1.000000E+00 |
|                | 0      | 1.000000E+00 |                | 0      | 1.000000E+00 |
|                | all    | 1.000000E+00 |                | all    | 1.000000E+00 |
| calf: IV4.L80  |        |              | calf: IV4.L90  |        |              |
| mother: IV4.F1 |        |              | mother: IV4.F1 |        |              |
| male: IV4.M2   | 0      | 1.000000E+00 | male: IV4.M2   | 0      | 1.000000E+00 |
|                | 0      | 1.000000E+00 |                | 0      | 1.000000E+00 |
|                | all    | 1.000000E+00 |                | all    | 1.000000E+00 |
| calf: IV4.L81  |        |              | calf: IV4.L91  |        |              |
| mother: IV4.F1 |        |              | mother: IV4.F1 |        |              |
| male: IV4.M2   | 0      | 1.000000E+00 | male: IV4.M2   | 0      | 1.000000E+00 |
|                | 0      | 1.000000E+00 |                | 0      | 1.000000E+00 |
|                | all    | 1.000000E+00 |                | all    | 1.000000E+00 |
| calf: IV4.L82  |        |              | calf: IV4.L92  |        |              |
| mother: IV4.F1 |        |              | mother: IV4.F1 |        |              |
| male: IV4.M2   | 0      | 1.000000E+00 | male: IV4.M2   | 0      | 1.000000E+00 |
|                | 0      | 1.000000E+00 |                | 0      | 1.000000E+00 |
|                | all    | 1.000000E+00 |                | all    | 1.000000E+00 |
| calf: IV4.L83  |        |              | calf: IV4.L93  |        |              |
| mother: IV4.F1 |        |              | mother: IV4.F1 |        |              |
| male: IV4.M2   | 0      | 1.000000E+00 | male: IV4.M2   | 0      | 1.000000E+00 |
|                | 0      | 1.000000E+00 |                | 0      | 1.000000E+00 |
|                | all    | 1.000000E+00 |                | all    | 1.000000E+00 |
| calf: IV4.L84  |        |              | calf: IV4.L94  |        |              |
| mother: IV4.F1 |        |              | mother: IV4.F1 |        |              |
| male: IV4.M2   | 0      | 1.000000E+00 | male: IV4.M2   | 0      | 1.000000E+00 |
|                | 0      | 1.000000E+00 |                | 0      | 1.000000E+00 |
|                | all    | 1.000000E+00 |                | all    | 1.000000E+00 |
| calf: IV4.L85  |        |              | calf: IV4.L95  |        |              |
| mother: IV4.F1 |        |              | mother: IV4.F1 |        |              |
| male: IV4.M1   | 0      | 1.000000E+00 | male: IV4.M1   | 0      | 1.000000E+00 |
|                | 0      | 1.000000E+00 |                | 0      | 1.000000E+00 |
|                | all    | 1.000000E+00 |                | all    | 1.000000E+00 |
| calf: IV4.L86  |        |              | calf: IV4.L96  |        |              |
| mother: IV4.F1 |        |              | mother: IV4.F1 |        |              |
| male: IV4.M2   | 0      | 1.000000E+00 | male: IV4.M2   | 0      | 1.000000E+00 |
|                | 0      | 1.000000E+00 |                | 0      | 1.000000E+00 |
|                | all    | 1.000000E+00 |                | all    | 1.000000E+00 |
| calf: IV4.L97  |        |              | calf: IV4.L107 |        |              |
| mother: IV4.F1 |        |              | mother: IV4.F1 |        |              |
| male: IV4.M2   | 0      | 1.000000E+00 | male: IV4.M2   | 0      | 1.000000E+00 |
|                | 0      | 1.000000E+00 |                | 0      | 1.000000E+00 |
|                | all    | 1.000000E+00 |                | all    | 1.000000E+00 |
| calf: IV4.L98  |        |              | calf: IV4.L108 |        |              |
| mother: IV4.F1 |        |              | mother: IV4.F1 |        |              |

| labels: group: P(father) |              |              |  | labels: group: P(father) |     |              |  |
|--------------------------|--------------|--------------|--|--------------------------|-----|--------------|--|
| male: IV4.M2             | 0            | 1.000000E+00 |  | male: IV4.M2             | 0   | 1.000000E+00 |  |
|                          | 0            | 1.000000E+00 |  |                          | 0   | 1.000000E+00 |  |
|                          | all          | 1.000000E+00 |  |                          | all | 1.000000E+00 |  |
| calf: IV4.L99            |              |              |  | calf: IV4.L109           |     |              |  |
| mother: IV4.F1           |              |              |  | mother: IV4.F1           |     |              |  |
| male: IV4.M2             | 0            | 1.000000E+00 |  | male: IV4.M2             | 0   | 1.000000E+00 |  |
|                          | 0            | 1.000000E+00 |  |                          | 0   | 1.000000E+00 |  |
|                          | all          | 1.000000E+00 |  |                          | all | 1.000000E+00 |  |
| calf: IV4.L100           |              |              |  | calf: IV4.L110           |     |              |  |
| mother: IV4.F1           |              |              |  | mother: IV4.F1           |     |              |  |
| male: IV4.M2             | 0            | 1.000000E+00 |  | male: IV4.M2             | 0   | 1.000000E+00 |  |
|                          | 0            | 1.000000E+00 |  |                          | 0   | 1.000000E+00 |  |
|                          | all          | 1.000000E+00 |  |                          | all | 1.000000E+00 |  |
| calf: IV4.L101           |              |              |  | calf: IV4.L111           |     |              |  |
| mother: IV4.F1           |              |              |  | mother: IV4.F1           |     |              |  |
| male: IV4.M2             | 0            | 1.000000E+00 |  | male: IV4.M2             | 0   | 1.000000E+00 |  |
|                          | 0            | 1.000000E+00 |  |                          | 0   | 1.000000E+00 |  |
|                          | all          | 1.000000E+00 |  |                          | all | 1.000000E+00 |  |
| calf: IV4.L102           |              |              |  | calf: IV4.L112           |     |              |  |
| mother: IV4.F1           |              |              |  | mother: IV4.F1           |     |              |  |
| male: IV4.M2             | 0            | 1.000000E+00 |  | male: IV4.M2             | 0   | 1.000000E+00 |  |
|                          | 0            | 1.000000E+00 |  |                          | 0   | 1.000000E+00 |  |
|                          | all          | 1.000000E+00 |  |                          | all | 1.000000E+00 |  |
| calf: IV4.L103           |              |              |  | calf: IV4.L113           |     |              |  |
| mother: IV4.F1           |              |              |  | mother: IV4.F1           |     |              |  |
| male: IV4.M2             | 0            | 1.000000E+00 |  | male: IV4.M2             | 0   | 1.000000E+00 |  |
|                          | 0            | 1.000000E+00 |  |                          | 0   | 1.000000E+00 |  |
|                          | all          | 1.000000E+00 |  |                          | all | 1.000000E+00 |  |
| calf: IV4.L104           |              |              |  | calf: IV4.L114           |     |              |  |
| mother: IV4.F1           |              |              |  | mother: IV4.F1           |     |              |  |
| male: IV4.M2             | 0            | 1.000000E+00 |  | male: IV4.M2             | 0   | 1.000000E+00 |  |
|                          | 0            | 1.000000E+00 |  |                          | 0   | 1.000000E+00 |  |
|                          | all          | 1.000000E+00 |  |                          | all | 1.000000E+00 |  |
| calf: IV4.L105           |              |              |  | calf: IV4.L115           |     |              |  |
| mother: IV4.F1           |              |              |  | mother: IV4.F1           |     |              |  |
| male: IV4.M1             | 0            | 1.000000E+00 |  | male: IV4.M1             | 0   | 1.000000E+00 |  |
| 0                        | 1.000000E+00 |              |  |                          | 0   | 1.000000E+00 |  |
| all                      | 1.000000E+00 |              |  |                          | all | 1.000000E+00 |  |
| calf: IV4.L106           |              |              |  | calf: IV4.L116           |     |              |  |
| mother: IV4.F1           |              |              |  | mother: IV4.F1           |     |              |  |
| male: IV4.M2             | 0            | 1.000000E+00 |  | male: IV4.M2             | 0   | 1.000000E+00 |  |
|                          | 0            | 1.000000E+00 |  |                          | 0   | 1.000000E+00 |  |
|                          | all          | 1.000000E+00 |  |                          | all | 1.000000E+00 |  |
| calf: IV4.L117           |              |              |  |                          |     |              |  |
| mother: IV4.F1           |              |              |  |                          |     |              |  |
| male: IV4.M2             | 0            | 1.000000E+00 |  |                          |     |              |  |
|                          | 0            | 1.000000E+00 |  |                          |     |              |  |
|                          | all          | 1.000000E+00 |  |                          |     |              |  |
| calf: IV4.L118           |              |              |  |                          |     |              |  |
| mother: IV4.F1           |              |              |  |                          |     |              |  |
| male: IV4.M2             | 0            | 1.000000E+00 |  |                          |     |              |  |

| labels:        | group: | P(father)    | labels: | group: | P(father) |
|----------------|--------|--------------|---------|--------|-----------|
|                | 0      | 1.000000E+00 |         |        |           |
|                | all    | 1.000000E+00 |         |        |           |
| calf: IV4.L119 |        |              |         |        |           |
| mother: IV4.F1 |        |              |         |        |           |
| male: IV4.M2   | 0      | 1.000000E+00 |         |        |           |
|                | 0      | 1.000000E+00 |         |        |           |
|                | all    | 1.000000E+00 |         |        |           |
| calf: IV4.L120 |        |              |         |        |           |
| mother: IV4.F1 |        |              |         |        |           |
| male: IV4.M2   | 0      | 1.000000E+00 |         |        |           |
|                | 0      | 1.000000E+00 |         |        |           |
|                | all    | 1.000000E+00 |         |        |           |
| calf: IV4.L121 |        |              |         |        |           |
| mother: IV4.F1 |        |              |         |        |           |
| male: IV4.M2   | 0      | 1.000000E+00 |         |        |           |
|                | 0      | 1.000000E+00 |         |        |           |
|                | all    | 1.000000E+00 |         |        |           |
| calf: IV4.L122 |        |              |         |        |           |
| mother: IV4.F1 |        |              |         |        |           |
| male: IV4.M2   | 0      | 1.000000E+00 |         |        |           |
|                | 0      | 1.000000E+00 |         |        |           |
|                | all    | 1.000000E+00 |         |        |           |
| calf: IV4.L123 |        |              |         |        |           |
| mother: IV4.F1 |        |              |         |        |           |
| male: IV4.M2   | 0      | 1.000000E+00 |         |        |           |
|                | 0      | 1.000000E+00 |         |        |           |
|                | all    | 1.000000E+00 |         |        |           |
| calf: IV4.L124 |        |              |         |        |           |
| mother: IV4.F1 |        |              |         |        |           |
| male: IV4.M2   | 0      | 1.000000E+00 |         |        |           |
|                | 0      | 1.000000E+00 |         |        |           |
|                | all    | 1.000000E+00 |         |        |           |
| calf: IV4.L125 |        |              |         |        |           |
| mother: IV4.F1 |        |              |         |        |           |
| male: IV4.M1   | 0      | 1.000000E+00 |         |        |           |
|                | 0      | 1.000000E+00 |         |        |           |
|                | all    | 1.000000E+00 |         |        |           |

### Legend:

<offspring ID>

<mother ID>

<male x ID>

<group of male x>

<Probability of male x is the father>

<group y>

< Probability of male x belongs to group y>

all

< Probability of male x has been sampled>
